# Supplementary material for: An International, Multicentered, Evidence-Based Reappraisal of Genes Reported to Cause Congenital Long QT Syndrome
Source: PubMed Central journal article supplement (PMC7017940; doi:10.1161/circulationaha.119.043132), 2020-01-27
Supplement: cir-141-418-s001.pdf [file cir-141-418-s001.pdf]

## **Supplemental material**

### **List of investigators:**

#### **NIH-ClinGen Clinical Domain Working Group:**

Michael H Gollob, M.D. (Chair)

The Division of Cardiology, Toronto General Hospital and The Toronto General Hospital Research Institute, University Health Network and University of Toronto, Toronto, ON, Canada

Michael Ackerman, M.D. Ph.D

Departments of Cardiovascular Diseases, Pediatrics, and Molecular Pharmacology and Experimental Therapeutics, Divisions of Heart Rhythm Services and Pediatric Cardiology, Windland Smith Rice Sudden Death Genomics Laboratory, Rochester, MN

John Garcia, Ph.D.

Invitae Corp. San Francisco, CA, USA

Ray E Hershberger. M.D.

Divisions of Human Genetics and Cardiovascular Medicine in the Department of Internal Medicine, Ohio State University, Columbus, OH, USA

Valeria Novelli, Ph.D.

Fondazione Policlinico Universitario A. Gemelli I.R.C.C.S., and Istituto di Medicina Genomica, Università Cattolica del Sacro Cuore, Rome, Italy

Marco V Perez. M.D.

Division of Cardiovascular Medicine, Department of Medicine, Stanford University, Stanford, CA, USA

Amy C Sturm, Ms.C

Geisinger Genomic Medicine Institute, Danville, PA, USA

James S Ware, Ph.D., M.R.C.P.

National Heart & Lung Institute and MRC London Institute of Medical Sciences, Imperial College London, Royal Brompton and Harefield Hospitals NHS Trust, London, UK

Arthur AAM Wilde. M.D. Ph.D,

Department of Clinical and Experimental Cardiology, Amsterdam Cardiovascular Sciences, Amsterdam UMC, University of Amsterdam, Heart Center; Amsterdam, The Netherlands

Wojciech Zareba. M.D., Ph.D

Cardiology Unit of the Department of Medicine, University of Rochester Medical Center, Rochester, NY, USA

**Bio-curators:**

Emanuela Abiusi, Ph.D

Fondazione Policlinico Universitario A. Gemelli I.R.C.C.S., and Istituto di Medicina Genomica, Università Cattolica del Sacro Cuore, Rome, Italy

Arnon Adler, M.D.

The Division of Cardiology, Toronto General Hospital, University Health Network and University of Toronto, Toronto, ON, Canada

Simona Amenta, M.D.

Fondazione Policlinico Universitario A. Gemelli I.R.C.C.S., and Istituto di Medicina Genomica, Università Cattolica del Sacro Cuore, Rome, Italy

Ahmad S Amin, M.D. Ph.D.

Department of Clinical and Experimental Cardiology, Amsterdam Cardiovascular Sciences, Amsterdam UMC, University of Amsterdam, Heart Center; Amsterdam, The Netherlands

Hennie Bikker, Ph.D.

Department of Clinical Genetics, Amsterdam UMC, University of Amsterdam, Heart Center; Amsterdam, The Netherlands

Melanie Care, Ms.C

The Division of Cardiology, Toronto General Hospital, University Health Network and University of Toronto, Toronto, ON, Canada

Harriet Feilotter, Ph.D

Department of Pathology and Molecular Medicine, Queen's University, Kingston, ON, Canada

Daniela Mazza, M.D.

Fondazione Policlinico Universitario A. Gemelli I.R.C.C.S., and Istituto di Medicina Genomica, Università Cattolica del Sacro Cuore, Rome, Italy

Eline A. Nannenbergh, M.D., Ph.D.

Department of Clinical Genetics, Amsterdam UMC, University of Amsterdam, Heart Center; Amsterdam, The Netherlands

## **List of genetic laboratories**

Admera Health (US)  
Ambry (US)  
Amsterdam Medical (Holland)  
ASpainer Biogene (Estonia)  
Bioscientia (Germany)  
Blueprint (Finland)  
CeGat (Germany)  
Cen4Gen (Canada)  
CentoGene (Germany)  
CGC Genetics (Portugal)  
Children's Minnesota (US)  
Cincinnati Children's (US)  
CTGT (US)  
DDC Clinic (US)  
EGL (US)  
Fulgent (US)  
GeneDx (US)  
GeneTaq (Spain)  
GPS WUSTL (US)  
Greenwood (US)  
Health[in]Code (Spain)  
Invitae (US)  
LabGenetics (Spain)  
LabPlus (New Zealand)  
Mayo Clinic (US)  
MNG Laboratories (US)  
Montreal Heart Institute (Canada)  
OHSU Knight (US)  
Phosphorus (US)  
PreventionGenetics (US)  
Reference Laboratory (Spain)  
Royal Brompton (UK)  
Sistemas (Spain)  
Sonic (Australia)  
Transgenomic (US)  
VSGS (Australia)

**Supplemental Table. Genetic variants in KCNE1 and KCNE2 previously reported in**

**aLQTS cases**

| AA change           | cDNA change | MAF (all)* | MAF† (highest) | References |
|---------------------|-------------|------------|----------------|------------|
| <b><i>KCNE1</i></b> |             |            |                |            |
| Asp76Asn            | 226G>A      | 0.00007    | 0.0001 (Eu)    | 1          |
| Asp85Asn            | 253G>A      | 0.009      | 0.025 (AJ)     | 1-5        |
| <b><i>KCNE2</i></b> |             |            |                |            |
| Thr8Ala             | 22A>G       | 0.004      | 0.006 (Eu)     | 2,6-8      |
| Gln9Glu             | 25C>G       | 0.0015     | 0.016 (Af)     | 6          |
| Leu11fsTer46        | Unavailable | 0          | 0              | 8          |
| Ile57Thr            | 170T>C      | 0.001      | 0.002 (Latino) | 6-8        |
| Met54Thr            | 161T>C      | 0.0002     | 0.005 (AJ)     | 7          |
| Ala116Val           | 347C>T      | 0.00002    | 0.00004 (Af)   | 7          |
| Met121Lys           | 362T>A      | 0.000008   | 0.00002 (Eu)   | 8          |

\* Minor allele frequency in gnomAD

† Highest minor allele frequency in any of the sub-populations available on gnomAD: Af- African; AJ- Ashkenazi Jewish; Eu- European (non-Finnish)

aLQTS- acquired long QT syndrome; MAF- minor allele frequency

**Table references**

1. Weeke P, Mosley JD, Hanna D, et al. Exome sequencing implicates an increased burden of rare potassium channel variants in the risk of drug-induced long QT interval syndrome. *J Am Coll Cardiol* 2014;63:1430-1437.
2. Paulussen AD, Gilissen RA, Armstrong M, et al. Genetic variations of KCNQ1, KCNH2, SCN5A, KCNE1, and KCNE2 in drug-induced long QT syndrome patients. *J Mol Med (Berl)* 2004;82:182-188.
3. Lane CM, Giudicessi JR, Ye D, et al. Long QT syndrome type 5-Lite: Defining the clinical phenotype associated with the potentially proarrhythmic p.Asp85Asn-KCNE1 common genetic variant. *Heart Rhythm* 2018;15:1223-1230.

4. Kaab S, Crawford DC, Sinner MF, et al. A large candidate gene survey identifies the KCNE1 D85N polymorphism as a possible modulator of drug-induced torsades de pointes. *Circ Cardiovasc Genet* 2012;5:91-99.
5. Nishio Y, Makiyama T, Itoh H, et al. D85N, a KCNE1 polymorphism, is a disease-causing gene variant in long QT syndrome. *J Am Coll Cardiol* 2009;54:812-819.
6. Abbott GW, Sesti F, Splawski I, et al. MiRP1 forms IKr potassium channels with HERG and is associated with cardiac arrhythmia. *Cell* 1999;97:175-187.
7. Sesti F, Abbott GW, Wei J, et al. A common polymorphism associated with antibiotic-induced cardiac arrhythmia. *Proc Natl Acad Sci U S A* 2000;97:10613-10618.
8. Roberts JD, Krahn AD, Ackerman MJ, et al. Loss-of-Function KCNE2 Variants: True Monogenic Culprits of Long-QT Syndrome or Proarrhythmic Variants Requiring Secondary Provocation? *Circ Arrhythm Electrophysiol* 2017;10: e005282.

## Gene classification matrices

### AKAP9

| Evidence Type                      |            |                                                       |                                         | Points Counted                                                                                  |             |                       | PMID        |                                                  |            |
|------------------------------------|------------|-------------------------------------------------------|-----------------------------------------|-------------------------------------------------------------------------------------------------|-------------|-----------------------|-------------|--------------------------------------------------|------------|
|                                    |            |                                                       |                                         | G1                                                                                              | G2          | G3                    |             |                                                  |            |
| Genetic Evidence                   | Case-Level | Variant                                               | Autosomal Dominant OR X-linked Disorder | Proband with other variant type with some evidence of gene impact                               | 1           | 1.25                  | 1.5         | 18093912; 28003625; 26132555; 29350269; 26189708 |            |
|                                    |            |                                                       |                                         | Proband with predicted or proven null variant                                                   | 0           | 0                     | 0           |                                                  |            |
|                                    |            |                                                       |                                         | Variant is <i>de novo</i>                                                                       | 0           | 0                     | 0           |                                                  |            |
|                                    |            |                                                       | Autosomal Recessive Disorder            | Two variants (not predicted/proven null) with some evidence of gene impact in <i>trans</i>      | 0           | 0                     | 0           |                                                  |            |
|                                    |            |                                                       |                                         | Two variants in <i>trans</i> and at least one <i>de novo</i> or a predicted/proven null variant |             |                       |             |                                                  |            |
|                                    |            |                                                       | Segregation                             | Candidate gene sequencing                                                                       | 0           | 0                     | 0           |                                                  |            |
|                                    |            | Exome/genome or all genes sequenced in linkage region |                                         |                                                                                                 |             |                       |             |                                                  |            |
|                                    |            | Case-Control                                          |                                         |                                                                                                 |             | 0                     | 0           |                                                  | 0          |
|                                    |            | <b>Genetic Evidence Total</b>                         |                                         |                                                                                                 |             | <b>1</b>              | <b>1.25</b> |                                                  | <b>1.5</b> |
|                                    |            | Experimental Evidence                                 | Functional                              |                                                                                                 |             | Biochemical functions | 1           |                                                  | 2          |
| Protein interactions               |            |                                                       |                                         |                                                                                                 |             |                       |             |                                                  |            |
| Expression                         |            |                                                       |                                         |                                                                                                 |             |                       |             |                                                  |            |
| Functional Alteration              |            |                                                       | Patient cells                           | 0.5                                                                                             | 0.5         | 0                     |             |                                                  |            |
|                                    |            |                                                       | Non-patient cells                       |                                                                                                 |             |                       |             |                                                  |            |
| Models                             |            |                                                       | Non-human model organism                | 0                                                                                               | 0           | 0                     |             |                                                  |            |
|                                    |            |                                                       | Cell-culture model                      |                                                                                                 |             |                       |             |                                                  |            |
| Rescue                             |            |                                                       | Rescue in human                         | 0                                                                                               | 0           | 0                     |             |                                                  |            |
|                                    |            |                                                       | Rescue in non-human model organism      |                                                                                                 |             |                       |             |                                                  |            |
|                                    |            |                                                       | Rescue in cell culture model            |                                                                                                 |             |                       |             |                                                  |            |
| Rescue in patient cells            |            |                                                       |                                         |                                                                                                 |             |                       |             |                                                  |            |
| <b>Experimental Evidence Total</b> |            |                                                       |                                         | <b>1.5</b>                                                                                      | <b>2.5</b>  | <b>0.5</b>            |             |                                                  |            |
| <b>Total Points</b>                |            |                                                       |                                         | <b>2.5</b>                                                                                      | <b>3.75</b> | <b>2</b>              |             |                                                  |            |
| <b>Summary Classification</b>      |            |                                                       |                                         | <b>Disputed</b>                                                                                 |             |                       |             |                                                  |            |

**ANK2**

| Evidence Type                      |                                                       |                              |                                                                                                 | Points Counted                                                    |            |            | PMID                       |                                                                         |
|------------------------------------|-------------------------------------------------------|------------------------------|-------------------------------------------------------------------------------------------------|-------------------------------------------------------------------|------------|------------|----------------------------|-------------------------------------------------------------------------|
|                                    |                                                       |                              |                                                                                                 | G1                                                                | G2         | G3         |                            |                                                                         |
| Genetic Evidence                   | Case-Level                                            | Variant                      | Autosomal Dominant OR X-linked Disorder                                                         | Proband with other variant type with some evidence of gene impact | 2          | 2.3        | 2.1                        | 26132555;28196901;16253912;15178757;16864073;17242276;27784853;28003625 |
|                                    |                                                       |                              |                                                                                                 | Proband with predicted or proven null variant                     | 0          | 0          | 0                          |                                                                         |
|                                    |                                                       |                              |                                                                                                 | Variant is <i>de novo</i>                                         | 0          | 0          | 0                          |                                                                         |
|                                    |                                                       | Autosomal Recessive Disorder | Two variants (not predicted/proven null) with some evidence of gene impact in <i>trans</i>      | 0                                                                 | 0          | 0          | 12571597                   |                                                                         |
|                                    |                                                       |                              | Two variants in <i>trans</i> and at least one <i>de novo</i> or a predicted/proven null variant | 0                                                                 | 0          | 0          |                            |                                                                         |
|                                    |                                                       | Segregation                  | Candidate gene sequencing                                                                       | 0                                                                 | 0          | 0          | 16253912;17242276;16864073 |                                                                         |
|                                    | Exome/genome or all genes sequenced in linkage region |                              | 0                                                                                               | 1.5                                                               | 0          |            |                            |                                                                         |
| Case-Control                       |                                                       |                              |                                                                                                 | 0                                                                 | 1.5        | 0          |                            |                                                                         |
| <b>Genetic Evidence Total</b>      |                                                       |                              |                                                                                                 | <b>2</b>                                                          | <b>3.8</b> | <b>2.1</b> |                            |                                                                         |
| Experimental Evidence              | Functional                                            |                              |                                                                                                 | Biochemical functions                                             | 0          | 0          | 0                          | 28196901;15178757;17242276;10579720;28196901<br>12571597                |
|                                    |                                                       |                              |                                                                                                 | Protein interactions                                              |            |            |                            |                                                                         |
|                                    |                                                       |                              |                                                                                                 | Expression                                                        |            |            |                            |                                                                         |
|                                    | Functional Alteration                                 |                              |                                                                                                 | Patient cells                                                     | 0.5        | 2          | 2                          |                                                                         |
|                                    |                                                       |                              |                                                                                                 | Non-patient cells                                                 |            |            |                            |                                                                         |
|                                    | Models                                                |                              |                                                                                                 | Non-human model organism                                          | 1          | 0          | 0                          |                                                                         |
|                                    |                                                       |                              |                                                                                                 | Cell-culture model                                                |            |            |                            |                                                                         |
|                                    | Rescue                                                |                              |                                                                                                 | Rescue in human                                                   | 1          | 0          | 0                          |                                                                         |
|                                    |                                                       |                              |                                                                                                 | Rescue in non-human model organism                                |            |            |                            |                                                                         |
|                                    |                                                       |                              |                                                                                                 | Rescue in cell culture model                                      |            |            |                            |                                                                         |
| Rescue in patient cells            |                                                       |                              |                                                                                                 |                                                                   |            |            |                            |                                                                         |
| <b>Experimental Evidence Total</b> |                                                       |                              |                                                                                                 | <b>1.5</b>                                                        | <b>2</b>   | <b>2</b>   |                            |                                                                         |
| <b>Total Points</b>                |                                                       |                              |                                                                                                 | <b>3.5</b>                                                        | <b>5.8</b> | <b>4.1</b> |                            |                                                                         |
| <b>Summary Classification</b>      |                                                       |                              |                                                                                                 | <b>Disputed</b>                                                   |            |            |                            |                                                                         |

**CACNA1C**

| Evidence Type                      |                                                       |                              |                                                                                                 | Points Counted                                                    |          |            | PMID                 |                                     |
|------------------------------------|-------------------------------------------------------|------------------------------|-------------------------------------------------------------------------------------------------|-------------------------------------------------------------------|----------|------------|----------------------|-------------------------------------|
|                                    |                                                       |                              |                                                                                                 | G1                                                                | G2       | G3         |                      |                                     |
| Genetic Evidence                   | Case-Level                                            | Variant                      | Autosomal Dominant OR X-linked Disorder                                                         | Proband with other variant type with some evidence of gene impact | 5        | 7          | 6                    | 25633834;23677916;24728418;27390944 |
|                                    |                                                       |                              |                                                                                                 | Proband with predicted or proven null variant                     | 0        | 0          | 0                    |                                     |
|                                    |                                                       |                              |                                                                                                 | Variant is <i>de novo</i>                                         | 0        | 0          | 0                    |                                     |
|                                    |                                                       | Autosomal Recessive Disorder | Two variants (not predicted/proven null) with some evidence of gene impact in <i>trans</i>      | 0                                                                 | 0        | 0          | 15863612             |                                     |
|                                    |                                                       |                              | Two variants in <i>trans</i> and at least one <i>de novo</i> or a predicted/proven null variant | 0                                                                 | 0        | 0          |                      |                                     |
|                                    |                                                       | Segregation                  | Candidate gene sequencing                                                                       | 0                                                                 | 0        | 1          | 24728418<br>23677916 |                                     |
|                                    | Exome/genome or all genes sequenced in linkage region |                              | 0                                                                                               | 0                                                                 | 0        |            |                      |                                     |
| Case-Control                       |                                                       |                              |                                                                                                 | 0                                                                 | 0        | 0          |                      |                                     |
| <b>Genetic Evidence Total</b>      |                                                       |                              |                                                                                                 | <b>5</b>                                                          | <b>7</b> | <b>7</b>   |                      |                                     |
| Experimental Evidence              | Functional                                            |                              |                                                                                                 | Biochemical functions                                             | 0        | 0          | 0                    | 25633834;23677916;24728418;27390944 |
|                                    |                                                       |                              |                                                                                                 | Protein interactions                                              |          |            |                      |                                     |
|                                    |                                                       |                              |                                                                                                 | Expression                                                        |          |            |                      |                                     |
|                                    | Functional Alteration                                 |                              |                                                                                                 | Patient cells                                                     | 1.5      | 2          | 1.5                  |                                     |
|                                    |                                                       |                              |                                                                                                 | Non-patient cells                                                 |          |            |                      |                                     |
|                                    | Models                                                |                              |                                                                                                 | Non-human model organism                                          | 0        | 0          | 0                    |                                     |
|                                    |                                                       |                              |                                                                                                 | Cell-culture model                                                |          |            |                      |                                     |
|                                    | Rescue                                                |                              |                                                                                                 | Rescue in human                                                   | 0        | 0          | 0                    |                                     |
|                                    |                                                       |                              |                                                                                                 | Rescue in non-human model organism                                |          |            |                      |                                     |
|                                    |                                                       |                              |                                                                                                 | Rescue in cell culture model                                      |          |            |                      |                                     |
| Rescue in patient cells            |                                                       |                              |                                                                                                 |                                                                   |          |            |                      |                                     |
| <b>Experimental Evidence Total</b> |                                                       |                              |                                                                                                 | <b>1.5</b>                                                        | <b>2</b> | <b>1.5</b> |                      |                                     |
| <b>Total Points</b>                |                                                       |                              |                                                                                                 | <b>6.5</b>                                                        | <b>9</b> | <b>8.5</b> |                      |                                     |
| <b>Summary Classification</b>      |                                                       |                              |                                                                                                 | <b>Moderate</b>                                                   |          |            |                      |                                     |

CALM1

| Evidence Type                      |                               |                                                       |                                                                                                 | Points Counted                                                    |             |                   | PMID                                                  |                            |
|------------------------------------|-------------------------------|-------------------------------------------------------|-------------------------------------------------------------------------------------------------|-------------------------------------------------------------------|-------------|-------------------|-------------------------------------------------------|----------------------------|
|                                    |                               |                                                       |                                                                                                 | G1                                                                | G2          | G3                |                                                       |                            |
| Genetic Evidence                   | Case-Level                    | Variant                                               | Autosomal Dominant OR X-linked Disorder                                                         | Proband with other variant type with some evidence of gene impact | 1           | 1                 | 0                                                     | 23388215;24076290;26969752 |
|                                    |                               |                                                       |                                                                                                 | Proband with predicted or proven null variant                     | 0           | 0                 | 0                                                     |                            |
|                                    |                               |                                                       |                                                                                                 | Variant is <i>de novo</i>                                         | 12          | 12                | 12                                                    |                            |
|                                    |                               | Autosomal Recessive Disorder                          | Two variants (not predicted/proven null) with some evidence of gene impact in <i>trans</i>      | 0                                                                 | 0           | 0                 |                                                       |                            |
|                                    |                               |                                                       | Two variants in <i>trans</i> and at least one <i>de novo</i> or a predicted/proven null variant |                                                                   |             |                   |                                                       |                            |
|                                    |                               |                                                       | Candidate gene sequencing                                                                       | 0                                                                 | 0           | 0.5               |                                                       |                            |
|                                    | Segregation                   | Exome/genome or all genes sequenced in linkage region |                                                                                                 |                                                                   |             |                   |                                                       |                            |
|                                    |                               | Case-Control                                          | 2                                                                                               | 2                                                                 | 6           | 26969752;24076290 |                                                       |                            |
|                                    | <b>Genetic Evidence Total</b> |                                                       |                                                                                                 |                                                                   | <b>12</b>   | <b>12</b>         | <b>12</b>                                             |                            |
|                                    | Experimental Evidence         | Functional                                            | Biochemical functions                                                                           | Protein interactions                                              | 1           | 0.5               | 0.5                                                   | 16556865                   |
| Expression                         |                               |                                                       |                                                                                                 |                                                                   |             |                   | 23388215                                              |                            |
| Patient cells                      |                               |                                                       |                                                                                                 | 2                                                                 | 2           | 2                 | 28158429                                              |                            |
| Functional Alteration              |                               |                                                       | Non-patient cells                                                                               |                                                                   |             |                   | 23388215;26969752;27374306;24958779;24816216;26309258 |                            |
|                                    |                               |                                                       | Non-human model organism                                                                        |                                                                   |             |                   |                                                       |                            |
|                                    |                               |                                                       | Cell-culture model                                                                              |                                                                   |             |                   |                                                       |                            |
| Rescue                             |                               | Rescue in human                                       | 0                                                                                               | 0                                                                 | 0           |                   |                                                       |                            |
|                                    |                               | Rescue in non-human model organism                    |                                                                                                 |                                                                   |             |                   |                                                       |                            |
|                                    |                               | Rescue in cell culture model                          |                                                                                                 |                                                                   |             |                   |                                                       |                            |
|                                    |                               | Rescue in patient cells                               |                                                                                                 |                                                                   |             |                   |                                                       |                            |
| <b>Experimental Evidence Total</b> |                               |                                                       |                                                                                                 | <b>3</b>                                                          | <b>2.5</b>  | <b>2.5</b>        |                                                       |                            |
| <b>Total Points</b>                |                               |                                                       |                                                                                                 | <b>15</b>                                                         | <b>14.5</b> | <b>14.5</b>       |                                                       |                            |
| <b>Summary Classification</b>      |                               |                                                       |                                                                                                 | <b>Definitive</b>                                                 |             |                   |                                                       |                            |

CALM2

| Evidence Type                      |                               |                                                       |                                                                                                 | Points Counted                                                    |             |           | PMID                                                  |                            |
|------------------------------------|-------------------------------|-------------------------------------------------------|-------------------------------------------------------------------------------------------------|-------------------------------------------------------------------|-------------|-----------|-------------------------------------------------------|----------------------------|
|                                    |                               |                                                       |                                                                                                 | G1                                                                | G2          | G3        |                                                       |                            |
| Genetic Evidence                   | Case-Level                    | Variant                                               | Autosomal Dominant OR X-linked Disorder                                                         | Proband with other variant type with some evidence of gene impact | 0           | 0         | 0                                                     | 26969752                   |
|                                    |                               |                                                       |                                                                                                 | Proband with predicted or proven null variant                     | 0           | 0         | 0                                                     |                            |
|                                    |                               |                                                       |                                                                                                 | Variant is <i>de novo</i>                                         | 12          | 12        | 12                                                    | 24917665;23388215;27374306 |
|                                    |                               | Autosomal Recessive Disorder                          | Two variants (not predicted/proven null) with some evidence of gene impact in <i>trans</i>      | 0                                                                 | 0           | 0         |                                                       |                            |
|                                    |                               |                                                       | Two variants in <i>trans</i> and at least one <i>de novo</i> or a predicted/proven null variant |                                                                   |             |           |                                                       |                            |
|                                    |                               |                                                       | Candidate gene sequencing                                                                       | 0                                                                 | 0           | 0         |                                                       |                            |
|                                    | Segregation                   | Exome/genome or all genes sequenced in linkage region |                                                                                                 |                                                                   |             |           |                                                       |                            |
|                                    |                               | Case-Control                                          | 2                                                                                               | 2                                                                 | 8           | 26969752  |                                                       |                            |
|                                    | <b>Genetic Evidence Total</b> |                                                       |                                                                                                 |                                                                   | <b>12</b>   | <b>12</b> | <b>12</b>                                             |                            |
|                                    | Experimental Evidence         | Functional                                            | Biochemical functions                                                                           | Protein interactions                                              | 1           | 0.5       | 1                                                     | 16556865;28575668          |
| Expression                         |                               |                                                       |                                                                                                 |                                                                   |             |           | 23388215;                                             |                            |
| Patient cells                      |                               |                                                       |                                                                                                 | 1                                                                 | 2           | 2         | 28335032;27765793                                     |                            |
| Functional Alteration              |                               |                                                       | Non-patient cells                                                                               |                                                                   |             |           | 23388215;27374306;24917665;24958779;24816216;26309258 |                            |
|                                    |                               |                                                       | Non-human model organism                                                                        |                                                                   |             |           |                                                       |                            |
|                                    |                               |                                                       | Cell-culture model                                                                              |                                                                   |             |           |                                                       |                            |
| Rescue                             |                               | Rescue in human                                       | 2                                                                                               | 1                                                                 | 2           |           |                                                       |                            |
|                                    |                               | Rescue in non-human model organism                    |                                                                                                 |                                                                   |             |           |                                                       |                            |
|                                    |                               | Rescue in cell culture model                          |                                                                                                 |                                                                   |             |           |                                                       |                            |
|                                    |                               | Rescue in patient cells                               |                                                                                                 |                                                                   |             |           |                                                       |                            |
| <b>Experimental Evidence Total</b> |                               |                                                       |                                                                                                 | <b>4</b>                                                          | <b>3.5</b>  | <b>5</b>  | 28335032;27765793                                     |                            |
| <b>Total Points</b>                |                               |                                                       |                                                                                                 | <b>16</b>                                                         | <b>15.5</b> | <b>17</b> |                                                       |                            |
| <b>Summary Classification</b>      |                               |                                                       |                                                                                                 | <b>Definitive</b>                                                 |             |           |                                                       |                            |



CALM3

| Evidence Type                      |                                    |                               |                                                       | Points Counted                                                                                  |                       |           | PMID      |                   |                      |
|------------------------------------|------------------------------------|-------------------------------|-------------------------------------------------------|-------------------------------------------------------------------------------------------------|-----------------------|-----------|-----------|-------------------|----------------------|
|                                    |                                    |                               |                                                       | G1                                                                                              | G2                    | G3        |           |                   |                      |
| Genetic Evidence                   | Case-Level                         | Variant                       | Autosomal Dominant OR X-linked Disorder               | Proband with other variant type with some evidence of gene impact                               | 1.5                   | 0.5       | 0.5       | 28491681          |                      |
|                                    |                                    |                               |                                                       | Proband with predicted or proven null variant                                                   | 0                     | 0         | 0         |                   |                      |
|                                    |                                    |                               |                                                       | Variant is <i>de novo</i>                                                                       | 10.5                  | 10.5      | 12        | 25460178;28491681 |                      |
|                                    |                                    |                               | Autosomal Recessive Disorder                          | Two variants (not predicted/proven null) with some evidence of gene impact in <i>trans</i>      | 0                     | 0         | 0         |                   |                      |
|                                    |                                    |                               |                                                       | Two variants in <i>trans</i> and at least one <i>de novo</i> or a predicted/proven null variant |                       |           |           |                   |                      |
|                                    |                                    |                               |                                                       | Candidate gene sequencing                                                                       | 0                     | 0         | 0         |                   |                      |
|                                    |                                    | Segregation                   | Exome/genome or all genes sequenced in linkage region |                                                                                                 |                       |           |           |                   |                      |
|                                    |                                    |                               | Case-Control                                          | 0                                                                                               | 0                     | 0         | 26969752  |                   |                      |
|                                    |                                    | <b>Genetic Evidence Total</b> |                                                       |                                                                                                 |                       | <b>12</b> | <b>11</b> | <b>12</b>         |                      |
|                                    |                                    | Experimental Evidence         |                                                       | Functional                                                                                      | Biochemical functions | 1         | 1         | 0.5               | 16556865<br>23388215 |
| Protein interactions               |                                    |                               |                                                       |                                                                                                 |                       |           |           |                   |                      |
| Expression                         |                                    |                               |                                                       |                                                                                                 |                       |           |           |                   |                      |
| Functional Alteration              | Patient cells                      |                               |                                                       | 0                                                                                               | 0                     | 0.5       |           |                   |                      |
|                                    | Non-patient cells                  |                               |                                                       |                                                                                                 |                       |           |           |                   |                      |
| Models                             | Non-human model organism           |                               |                                                       | 0                                                                                               | 0                     | 0         |           |                   |                      |
|                                    | Cell-culture model                 |                               |                                                       |                                                                                                 |                       |           |           |                   |                      |
| Rescue                             | Rescue in human                    |                               |                                                       | 0                                                                                               | 0                     | 0         |           |                   |                      |
|                                    | Rescue in non-human model organism |                               |                                                       |                                                                                                 |                       |           |           |                   |                      |
|                                    | Rescue in cell culture model       |                               |                                                       |                                                                                                 |                       |           |           |                   |                      |
|                                    | Rescue in patient cells            |                               |                                                       |                                                                                                 |                       |           |           |                   |                      |
| <b>Experimental Evidence Total</b> |                                    |                               |                                                       | <b>1</b>                                                                                        | <b>1</b>              | <b>1</b>  |           |                   |                      |
| <b>Total Points</b>                |                                    |                               |                                                       | <b>13</b>                                                                                       | <b>12</b>             | <b>13</b> |           |                   |                      |
| <b>Summary Classification</b>      |                                    |                               |                                                       | <b>Definitive</b>                                                                               |                       |           |           |                   |                      |

CAV3

| Evidence Type                      |            |                                                                                                 |                                                       | Points Counted                                                                             |          |            | PMID                                   |                                     |
|------------------------------------|------------|-------------------------------------------------------------------------------------------------|-------------------------------------------------------|--------------------------------------------------------------------------------------------|----------|------------|----------------------------------------|-------------------------------------|
|                                    |            |                                                                                                 |                                                       | G1                                                                                         | G2       | G3         |                                        |                                     |
| Genetic Evidence                   | Case-Level | Variant                                                                                         | Autosomal Dominant OR X-linked Disorder               | Proband with other variant type with some evidence of gene impact                          | 0        | 0          | 1                                      | 17060380;26132555;24917393;24021552 |
|                                    |            |                                                                                                 |                                                       | Proband with predicted or proven null variant                                              | 0        | 0          | 0                                      |                                     |
|                                    |            |                                                                                                 |                                                       | Variant is <i>de novo</i>                                                                  | 3.5      | 2          | 3                                      | 17060380                            |
|                                    |            |                                                                                                 | Autosomal Recessive Disorder                          | Two variants (not predicted/proven null) with some evidence of gene impact in <i>trans</i> | 0        | 0          | 0                                      |                                     |
|                                    |            | Two variants in <i>trans</i> and at least one <i>de novo</i> or a predicted/proven null variant |                                                       |                                                                                            |          |            |                                        |                                     |
|                                    |            | Segregation                                                                                     | Candidate gene sequencing                             | 0                                                                                          | 0        | 0          |                                        |                                     |
|                                    |            |                                                                                                 | Exome/genome or all genes sequenced in linkage region |                                                                                            |          |            |                                        |                                     |
| Case-Control                       |            |                                                                                                 |                                                       | 0                                                                                          | 0        | 0          |                                        |                                     |
| <b>Genetic Evidence Total</b>      |            |                                                                                                 |                                                       | <b>3.5</b>                                                                                 | <b>2</b> | <b>4</b>   |                                        |                                     |
| Experimental Evidence              |            | Functional                                                                                      | Biochemical functions                                 | 1                                                                                          | 1.5      | 0          | 17060380;24021552;23640888<br>14663034 |                                     |
|                                    |            |                                                                                                 | Protein interactions                                  |                                                                                            |          |            |                                        |                                     |
|                                    |            |                                                                                                 | Expression                                            |                                                                                            |          |            |                                        |                                     |
|                                    |            | Functional Alteration                                                                           | Patient cells                                         | 0.5                                                                                        | 1.5      | 0.5        |                                        |                                     |
|                                    |            |                                                                                                 | Non-patient cells                                     |                                                                                            |          |            |                                        |                                     |
|                                    |            | Models                                                                                          | Non-human model organism                              | 0                                                                                          | 0        | 0          |                                        |                                     |
|                                    |            |                                                                                                 | Cell-culture model                                    |                                                                                            |          |            |                                        |                                     |
|                                    |            | Rescue                                                                                          | Rescue in human                                       | 0                                                                                          | 0        | 0          |                                        |                                     |
|                                    |            |                                                                                                 | Rescue in non-human model organism                    |                                                                                            |          |            |                                        |                                     |
|                                    |            |                                                                                                 | Rescue in cell culture model                          |                                                                                            |          |            |                                        |                                     |
| Rescue in patient cells            |            |                                                                                                 |                                                       |                                                                                            |          |            |                                        |                                     |
| <b>Experimental Evidence Total</b> |            |                                                                                                 |                                                       | <b>1.5</b>                                                                                 | <b>3</b> | <b>0.5</b> |                                        |                                     |
| <b>Total Points</b>                |            |                                                                                                 |                                                       | <b>5</b>                                                                                   | <b>5</b> | <b>4.5</b> |                                        |                                     |
| <b>Summary Classification</b>      |            |                                                                                                 |                                                       | <b>Limited</b>                                                                             |          |            |                                        |                                     |

KCNE1

| Evidence Type               |                       |                                                       |                                                                                                 | Points Counted                                                    |      |      | PMID                             |                                                                                                      |
|-----------------------------|-----------------------|-------------------------------------------------------|-------------------------------------------------------------------------------------------------|-------------------------------------------------------------------|------|------|----------------------------------|------------------------------------------------------------------------------------------------------|
|                             |                       |                                                       |                                                                                                 | G1                                                                | G2   | G3   |                                  |                                                                                                      |
| Genetic Evidence            | Case-Level            | Variant                                               | Autosomal Dominant OR X-linked Disorder                                                         | Proband with other variant type with some evidence of gene impact | 1.5  | 2.85 | 0.75                             | 21712262;17341399;9445165;14499862;9354802;10400998;29672598;16155735                                |
|                             |                       |                                                       |                                                                                                 | Proband with predicted or proven null variant                     | 0    | 0    | 0                                |                                                                                                      |
|                             |                       |                                                       |                                                                                                 | Variant is <i>de novo</i>                                         | 0    | 0    | 0                                |                                                                                                      |
|                             |                       | Autosomal Recessive Disorder                          | Two variants (not predicted/proven null) with some evidence of gene impact in <i>trans</i>      | 0                                                                 | 0    | 0    | 9354783;9445165;29625280;9354802 |                                                                                                      |
|                             |                       |                                                       | Two variants in <i>trans</i> and at least one <i>de novo</i> or a predicted/proven null variant |                                                                   |      |      |                                  |                                                                                                      |
|                             |                       |                                                       | Candidate gene sequencing                                                                       | 0                                                                 | 0    | 0    |                                  |                                                                                                      |
|                             | Segregation           | Exome/genome or all genes sequenced in linkage region | 0                                                                                               | 0                                                                 | 0    |      |                                  |                                                                                                      |
|                             |                       | Case-Control                                          | 0                                                                                               | 0                                                                 | 0    |      |                                  |                                                                                                      |
| Genetic Evidence Total      |                       |                                                       |                                                                                                 | 1.5                                                               | 2.85 | 0.75 |                                  |                                                                                                      |
| Experimental Evidence       | Functional            |                                                       |                                                                                                 | Biochemical functions                                             | 0.5  | 0    | 1                                | 1939241<br>9201970;20196769                                                                          |
|                             |                       |                                                       |                                                                                                 | Protein interactions                                              |      |      |                                  |                                                                                                      |
|                             |                       |                                                       |                                                                                                 | Expression                                                        |      |      |                                  |                                                                                                      |
|                             | Functional Alteration |                                                       |                                                                                                 | Patient cells                                                     | 1.5  | 2    | 2                                | 9354802;10400998;29625280;16945797;14499862;17341399;19907016;27076034;14499862<br>27076034;11320260 |
|                             |                       |                                                       |                                                                                                 | Non-patient cells                                                 |      |      |                                  |                                                                                                      |
|                             | Models                |                                                       |                                                                                                 | Non-human model organism                                          |      |      |                                  |                                                                                                      |
|                             |                       |                                                       |                                                                                                 | Cell-culture model                                                |      |      |                                  |                                                                                                      |
|                             | Rescue                |                                                       |                                                                                                 | Rescue in human                                                   | 2    | 1    | 2                                |                                                                                                      |
|                             |                       |                                                       |                                                                                                 | Rescue in non-human model organism                                |      |      |                                  |                                                                                                      |
|                             |                       |                                                       |                                                                                                 | Rescue in cell culture model                                      |      |      |                                  |                                                                                                      |
| Rescue in patient cells     |                       |                                                       |                                                                                                 |                                                                   |      |      |                                  |                                                                                                      |
| Experimental Evidence Total |                       |                                                       |                                                                                                 | 4                                                                 | 3    | 5    |                                  |                                                                                                      |
| Total Points                |                       |                                                       |                                                                                                 | 5.5                                                               | 5.85 | 5.75 |                                  |                                                                                                      |
| Summary Classification      |                       |                                                       |                                                                                                 | Limited                                                           |      |      |                                  |                                                                                                      |

KCNE2

| Evidence Type               |                       |                                                       |                                                                                                 | Points Counted                                                    |     |                                      | PMID                                            |                                                 |
|-----------------------------|-----------------------|-------------------------------------------------------|-------------------------------------------------------------------------------------------------|-------------------------------------------------------------------|-----|--------------------------------------|-------------------------------------------------|-------------------------------------------------|
|                             |                       |                                                       |                                                                                                 | G1                                                                | G2  | G3                                   |                                                 |                                                 |
| Genetic Evidence            | Case-Level            | Variant                                               | Autosomal Dominant OR X-linked Disorder                                                         | Proband with other variant type with some evidence of gene impact | 0   | 1.5                                  | 1.6                                             | 10219239;28794082;18006462;12185453;23631727    |
|                             |                       |                                                       |                                                                                                 | Proband with predicted or proven null variant                     | 0   | 0                                    | 0                                               |                                                 |
|                             |                       |                                                       |                                                                                                 | Variant is <i>de novo</i>                                         | 0   | 0                                    | 0                                               |                                                 |
|                             |                       | Autosomal Recessive Disorder                          | Two variants (not predicted/proven null) with some evidence of gene impact in <i>trans</i>      | 0                                                                 | 0   | 0                                    | 10219239;15292247;11927665<br>11101505;12185453 |                                                 |
|                             |                       |                                                       | Two variants in <i>trans</i> and at least one <i>de novo</i> or a predicted/proven null variant |                                                                   |     |                                      |                                                 |                                                 |
|                             |                       |                                                       | Candidate gene sequencing                                                                       | 0                                                                 | 0   | 0                                    |                                                 |                                                 |
|                             | Segregation           | Exome/genome or all genes sequenced in linkage region | 0                                                                                               | 0                                                                 | 0   | 10219239;18006462;12185453;12923204; |                                                 |                                                 |
|                             |                       | Case-Control                                          | 0                                                                                               | 1                                                                 | 0   |                                      |                                                 |                                                 |
| Genetic Evidence Total      |                       |                                                       |                                                                                                 | 0                                                                 | 2.5 | 1.6                                  |                                                 |                                                 |
| Experimental Evidence       | Functional            |                                                       |                                                                                                 | Biochemical functions                                             | 1.5 | 0.5                                  | 0                                               | 10219239;15292247;11927665<br>11101505;12185453 |
|                             |                       |                                                       |                                                                                                 | Protein interactions                                              |     |                                      |                                                 |                                                 |
|                             |                       |                                                       |                                                                                                 | Expression                                                        |     |                                      |                                                 |                                                 |
|                             | Functional Alteration |                                                       |                                                                                                 | Patient cells                                                     | 0.5 | 2                                    | 0.5                                             | 10219239;18006462;12185453;12923204;            |
|                             |                       |                                                       |                                                                                                 | Non-patient cells                                                 |     |                                      |                                                 |                                                 |
|                             | Models                |                                                       |                                                                                                 | Non-human model organism                                          |     |                                      |                                                 |                                                 |
|                             |                       |                                                       |                                                                                                 | Cell-culture model                                                |     |                                      |                                                 |                                                 |
|                             | Rescue                |                                                       |                                                                                                 | Rescue in human                                                   | 0   | 0                                    | 0                                               |                                                 |
|                             |                       |                                                       |                                                                                                 | Rescue in non-human model organism                                |     |                                      |                                                 |                                                 |
|                             |                       |                                                       |                                                                                                 | Rescue in cell culture model                                      |     |                                      |                                                 |                                                 |
| Rescue in patient cells     |                       |                                                       |                                                                                                 |                                                                   |     |                                      |                                                 |                                                 |
| Experimental Evidence Total |                       |                                                       |                                                                                                 | 2                                                                 | 2.5 | 0.5                                  |                                                 |                                                 |
| Total Points                |                       |                                                       |                                                                                                 | 2                                                                 | 5   | 2.1                                  |                                                 |                                                 |
| Summary Classification      |                       |                                                       |                                                                                                 | Disputed                                                          |     |                                      |                                                 |                                                 |

KCNH2

| Evidence Type               |                                                       |                              |                                                                                                 | Points Counted                                                    |                       |     | PMID                               |                                                                                                                |
|-----------------------------|-------------------------------------------------------|------------------------------|-------------------------------------------------------------------------------------------------|-------------------------------------------------------------------|-----------------------|-----|------------------------------------|----------------------------------------------------------------------------------------------------------------|
|                             |                                                       |                              |                                                                                                 | G1                                                                | G2                    | G3  |                                    |                                                                                                                |
| Genetic Evidence            | Case-Level                                            | Variant                      | Autosomal Dominant OR X-linked Disorder                                                         | Proband with other variant type with some evidence of gene impact | 0.5                   | 4.5 | 0                                  | 19668779;19187913;8635257;7889573;21240260;19070294;21109023<br>15840476;10973849;7889573;18551196;<br>7889573 |
|                             |                                                       |                              |                                                                                                 | Proband with predicted or proven null variant                     | 9                     | 1.5 | 9                                  |                                                                                                                |
|                             |                                                       |                              |                                                                                                 | Variant is <i>de novo</i>                                         | 0                     | 0   | 2                                  |                                                                                                                |
|                             |                                                       | Autosomal Recessive Disorder | Two variants (not predicted/proven null) with some evidence of gene impact in <i>trans</i>      | 0                                                                 | 0                     | 0   | 7889573;19668779;19187913;8635257; |                                                                                                                |
|                             |                                                       |                              | Two variants in <i>trans</i> and at least one <i>de novo</i> or a predicted/proven null variant |                                                                   |                       |     |                                    |                                                                                                                |
|                             |                                                       | Segregation                  | Candidate gene sequencing                                                                       | 1.5                                                               | 3                     | 3   | 24606995;19841300                  |                                                                                                                |
|                             | Exome/genome or all genes sequenced in linkage region |                              |                                                                                                 |                                                                   |                       |     |                                    |                                                                                                                |
|                             | Case-Control                                          |                              |                                                                                                 |                                                                   | 1                     | 3   | 0                                  |                                                                                                                |
|                             | Genetic Evidence Total                                |                              |                                                                                                 |                                                                   | 12                    | 12  | 12                                 |                                                                                                                |
|                             | Experimental Evidence                                 | Functional                   |                                                                                                 |                                                                   | Biochemical functions | 2   | 1.5                                | 0.5                                                                                                            |
| Protein interactions        |                                                       |                              |                                                                                                 |                                                                   |                       |     |                                    |                                                                                                                |
| Expression                  |                                                       |                              |                                                                                                 |                                                                   |                       |     |                                    |                                                                                                                |
| Functional Alteration       |                                                       |                              |                                                                                                 | Patient cells                                                     | 1.5                   | 2   | 2                                  | 21240260;28433559;<br>16432067;23997099;21536673;19187913;10753933                                             |
|                             |                                                       |                              |                                                                                                 | Non-patient cells                                                 |                       |     |                                    |                                                                                                                |
| Models                      |                                                       |                              |                                                                                                 | Non-human model organism                                          | 4                     | 2.5 | 4                                  | 12612061<br>15760896                                                                                           |
|                             |                                                       |                              |                                                                                                 | Cell-culture model                                                |                       |     |                                    |                                                                                                                |
| Rescue                      |                                                       |                              |                                                                                                 | Rescue in human                                                   | 4                     | 2.5 | 4                                  | 21458413;23303164<br>21536673<br>24213244                                                                      |
|                             |                                                       |                              |                                                                                                 | Rescue in non-human model organism                                |                       |     |                                    |                                                                                                                |
|                             |                                                       |                              |                                                                                                 | Rescue in cell culture model                                      |                       |     |                                    |                                                                                                                |
| Rescue in patient cells     |                                                       |                              |                                                                                                 |                                                                   |                       |     |                                    |                                                                                                                |
| Experimental Evidence Total |                                                       |                              |                                                                                                 | 6                                                                 | 6                     | 6   |                                    |                                                                                                                |
| Total Points                |                                                       |                              |                                                                                                 | 18                                                                | 18                    | 18  |                                    |                                                                                                                |
| Summary Classification      |                                                       |                              |                                                                                                 | Definitive                                                        |                       |     |                                    |                                                                                                                |

KCNJ2

| Evidence Type               |                                                       |                              |                                                                                                 | Points Counted                                                    |     |     | PMID                                         |                                                                                 |
|-----------------------------|-------------------------------------------------------|------------------------------|-------------------------------------------------------------------------------------------------|-------------------------------------------------------------------|-----|-----|----------------------------------------------|---------------------------------------------------------------------------------|
|                             |                                                       |                              |                                                                                                 | G1                                                                | G2  | G3  |                                              |                                                                                 |
| Genetic Evidence            | Case-Level                                            | Variant                      | Autosomal Dominant OR X-linked Disorder                                                         | Proband with other variant type with some evidence of gene impact | 0   | 1.5 | 2.6                                          | 20111058;24395924;23644778;22589293;15276028;28003625<br>21148745;<br>11371347; |
|                             |                                                       |                              |                                                                                                 | Proband with predicted or proven null variant                     | 0   | 0   | 0                                            |                                                                                 |
|                             |                                                       |                              |                                                                                                 | Variant is <i>de novo</i>                                         | 0   | 0   | 0                                            |                                                                                 |
|                             |                                                       | Autosomal Recessive Disorder | Two variants (not predicted/proven null) with some evidence of gene impact in <i>trans</i>      | 0                                                                 | 0   | 0   | 11371347;16571646;29017447;12148092;15276028 |                                                                                 |
|                             |                                                       |                              | Two variants in <i>trans</i> and at least one <i>de novo</i> or a predicted/proven null variant |                                                                   |     |     |                                              |                                                                                 |
|                             |                                                       | Segregation                  | Candidate gene sequencing                                                                       | 0                                                                 | 0   | 0   | 11371347;16571646;29017447;12148092;15276028 |                                                                                 |
|                             | Exome/genome or all genes sequenced in linkage region |                              |                                                                                                 |                                                                   |     |     |                                              |                                                                                 |
|                             | Case-Control                                          |                              |                                                                                                 |                                                                   | 0   | 0   | 0                                            |                                                                                 |
| Genetic Evidence Total      |                                                       |                              |                                                                                                 | 0                                                                 | 1.5 | 2.6 |                                              |                                                                                 |
| Experimental Evidence       | Functional                                            |                              |                                                                                                 | Biochemical functions                                             | 0.5 | 0   | 0                                            | 11371347                                                                        |
|                             |                                                       |                              |                                                                                                 | Protein interactions                                              |     |     |                                              |                                                                                 |
|                             |                                                       |                              |                                                                                                 | Expression                                                        |     |     |                                              |                                                                                 |
|                             | Functional Alteration                                 |                              |                                                                                                 | Patient cells                                                     | 1.5 | 0.5 | 1.5                                          | 15831539;16541386;17582433;23644778;22589293;15276028                           |
|                             |                                                       |                              |                                                                                                 | Non-patient cells                                                 |     |     |                                              |                                                                                 |
|                             | Models                                                |                              |                                                                                                 | Non-human model organism                                          | 1   | 0   | 0                                            | 21493816                                                                        |
|                             |                                                       |                              |                                                                                                 | Cell-culture model                                                |     |     |                                              |                                                                                 |
|                             | Rescue                                                |                              |                                                                                                 | Rescue in human                                                   | 1   | 0   | 0                                            | 21493816                                                                        |
|                             |                                                       |                              |                                                                                                 | Rescue in non-human model organism                                |     |     |                                              |                                                                                 |
|                             |                                                       |                              |                                                                                                 | Rescue in cell culture model                                      |     |     |                                              |                                                                                 |
| Rescue in patient cells     |                                                       |                              |                                                                                                 |                                                                   |     |     |                                              |                                                                                 |
| Experimental Evidence Total |                                                       |                              |                                                                                                 | 3                                                                 | 0.5 | 1.5 |                                              |                                                                                 |
| Total Points                |                                                       |                              |                                                                                                 | 3                                                                 | 2   | 4.1 |                                              |                                                                                 |
| Summary Classification      |                                                       |                              |                                                                                                 | Limited                                                           |     |     |                                              |                                                                                 |

KCNJ5

| Evidence Type                      |                                                       |                              |                                                                                                 | Points Counted                                                    |            |            | PMID              |                   |
|------------------------------------|-------------------------------------------------------|------------------------------|-------------------------------------------------------------------------------------------------|-------------------------------------------------------------------|------------|------------|-------------------|-------------------|
|                                    |                                                       |                              |                                                                                                 | G1                                                                | G2         | G3         |                   |                   |
| Genetic Evidence                   | Case-Level                                            | Variant                      | Autosomal Dominant OR X-linked Disorder                                                         | Proband with other variant type with some evidence of gene impact | 0          | 0          | 0.5               | 20560207          |
|                                    |                                                       |                              |                                                                                                 | Proband with predicted or proven null variant                     | 0          | 0          | 0                 |                   |
|                                    |                                                       |                              |                                                                                                 | Variant is <i>de novo</i>                                         | 0          | 0          | 0                 |                   |
|                                    | Segregation                                           | Autosomal Recessive Disorder | Two variants (not predicted/proven null) with some evidence of gene impact in <i>trans</i>      | 0                                                                 | 0          | 0          | 23872692;25417227 |                   |
|                                    |                                                       |                              | Two variants in <i>trans</i> and at least one <i>de novo</i> or a predicted/proven null variant |                                                                   |            |            |                   |                   |
|                                    |                                                       |                              | Candidate gene sequencing                                                                       | 0                                                                 | 0          | 0          |                   |                   |
|                                    | Exome/genome or all genes sequenced in linkage region |                              |                                                                                                 |                                                                   |            |            |                   |                   |
| Case-Control                       |                                                       |                              |                                                                                                 | 0                                                                 | 0          | 0          |                   |                   |
| <b>Genetic Evidence Total</b>      |                                                       |                              |                                                                                                 | <b>0</b>                                                          | <b>0</b>   | <b>0</b>   |                   |                   |
| Experimental Evidence              | Functional                                            |                              |                                                                                                 | Biochemical functions                                             | 0          | 1          | 1                 | 24148898          |
|                                    |                                                       |                              |                                                                                                 | Protein interactions                                              |            |            |                   |                   |
|                                    |                                                       |                              |                                                                                                 | Expression                                                        |            |            |                   |                   |
|                                    | Functional Alteration                                 |                              |                                                                                                 | Patient cells                                                     | 0          | 0.5        | 0.5               | 24148898;20560207 |
|                                    |                                                       |                              |                                                                                                 | Non-patient cells                                                 |            |            |                   |                   |
|                                    | Models                                                |                              |                                                                                                 | Non-human model organism                                          | 0          | 0          | 0                 | 24574546;20560207 |
|                                    |                                                       |                              |                                                                                                 | Cell-culture model                                                |            |            |                   |                   |
|                                    | Rescue                                                |                              |                                                                                                 | Rescue in human                                                   | 0          | 0          | 0                 |                   |
|                                    |                                                       |                              |                                                                                                 | Rescue in non-human model organism                                |            |            |                   |                   |
|                                    |                                                       |                              |                                                                                                 | Rescue in cell culture model                                      |            |            |                   |                   |
|                                    |                                                       |                              |                                                                                                 | Rescue in patient cells                                           |            |            |                   |                   |
| <b>Experimental Evidence Total</b> |                                                       |                              |                                                                                                 | <b>0</b>                                                          | <b>1.5</b> | <b>1.5</b> |                   |                   |
| <b>Total Points</b>                |                                                       |                              |                                                                                                 | <b>0</b>                                                          | <b>1.5</b> | <b>2</b>   |                   |                   |
| <b>Summary Classification</b>      |                                                       |                              |                                                                                                 | <b>Disputed</b>                                                   |            |            |                   |                   |

KCNQ1

| Evidence Type                      |                                                       |                              |                                                                                                 | Points Counted                                                    |           |           | PMID                      |                                                                                                  |
|------------------------------------|-------------------------------------------------------|------------------------------|-------------------------------------------------------------------------------------------------|-------------------------------------------------------------------|-----------|-----------|---------------------------|--------------------------------------------------------------------------------------------------|
|                                    |                                                       |                              |                                                                                                 | G1                                                                | G2        | G3        |                           |                                                                                                  |
| Genetic Evidence                   | Case-Level                                            | Variant                      | Autosomal Dominant OR X-linked Disorder                                                         | Proband with other variant type with some evidence of gene impact | 1         | 3.5       | 2.5                       | 17655673;15950200;20660394;8528244;25889101;10220144;22739119;8528244                            |
|                                    |                                                       |                              |                                                                                                 | Proband with predicted or proven null variant                     | 1.5       | 1.5       | 7.5                       |                                                                                                  |
|                                    |                                                       |                              |                                                                                                 | Variant is <i>de novo</i>                                         | 3.5       | 2         | 0                         |                                                                                                  |
|                                    | Segregation                                           | Autosomal Recessive Disorder | Two variants (not predicted/proven null) with some evidence of gene impact in <i>trans</i>      | 0                                                                 |           | 0         | 8872472;10220144;25139741 |                                                                                                  |
|                                    |                                                       |                              | Two variants in <i>trans</i> and at least one <i>de novo</i> or a predicted/proven null variant |                                                                   |           |           |                           |                                                                                                  |
|                                    |                                                       |                              | Candidate gene sequencing                                                                       | 1.5                                                               | 2.5       | 3         |                           |                                                                                                  |
|                                    | Exome/genome or all genes sequenced in linkage region |                              |                                                                                                 |                                                                   |           |           |                           |                                                                                                  |
| Case-Control                       |                                                       |                              |                                                                                                 | 6                                                                 | 3         | 0         | 19841300;11216980         |                                                                                                  |
| <b>Genetic Evidence Total</b>      |                                                       |                              |                                                                                                 | <b>12</b>                                                         | <b>12</b> | <b>12</b> |                           |                                                                                                  |
| Experimental Evidence              | Functional                                            |                              |                                                                                                 | Biochemical functions                                             | 1         | 0.5       | 0                         | 8900283;9108097                                                                                  |
|                                    |                                                       |                              |                                                                                                 | Protein interactions                                              |           |           |                           |                                                                                                  |
|                                    |                                                       |                              |                                                                                                 | Expression                                                        |           |           |                           |                                                                                                  |
|                                    | Functional Alteration                                 |                              |                                                                                                 | Patient cells                                                     | 1.5       | 2         | 2                         | 20660394;22739119;25889101                                                                       |
|                                    |                                                       |                              |                                                                                                 | Non-patient cells                                                 |           |           |                           |                                                                                                  |
|                                    | Models                                                |                              |                                                                                                 | Non-human model organism                                          | 1.5       | 2         | 2                         | 9323054;9312006;20421371;17655673;15950200;25139741;20660394;22739119;16246960;15358555;22095730 |
|                                    |                                                       |                              |                                                                                                 | Cell-culture model                                                |           |           |                           |                                                                                                  |
|                                    | Rescue                                                |                              |                                                                                                 | Rescue in human                                                   | 4         | 5         | 4                         | 15498462;18464931;17360457                                                                       |
|                                    |                                                       |                              |                                                                                                 | Rescue in non-human model organism                                |           |           |                           |                                                                                                  |
|                                    |                                                       |                              |                                                                                                 | Rescue in cell culture model                                      |           |           |                           |                                                                                                  |
|                                    |                                                       |                              |                                                                                                 | Rescue in patient cells                                           |           |           |                           |                                                                                                  |
| <b>Experimental Evidence Total</b> |                                                       |                              |                                                                                                 | <b>6</b>                                                          | <b>6</b>  | <b>6</b>  | 25889101                  |                                                                                                  |
| <b>Total Points</b>                |                                                       |                              |                                                                                                 | <b>18</b>                                                         | <b>18</b> | <b>18</b> |                           |                                                                                                  |
| <b>Summary Classification</b>      |                                                       |                              |                                                                                                 | <b>Definitive</b>                                                 |           |           |                           |                                                                                                  |

SCN4B

| Evidence Type                 |            |                                    |                                                                                                 | Points Counted                                                    |             |            | PMID     |                                     |
|-------------------------------|------------|------------------------------------|-------------------------------------------------------------------------------------------------|-------------------------------------------------------------------|-------------|------------|----------|-------------------------------------|
|                               |            |                                    |                                                                                                 | G1                                                                | G2          | G3         |          |                                     |
| Genetic Evidence              | Case-Level | Variant                            | Autosomal Dominant OR X-linked Disorder                                                         | Proband with other variant type with some evidence of gene impact | 0.5         | 0.75       | 0.5      | 17592081;20226894;23861362;23631430 |
|                               |            |                                    |                                                                                                 | Proband with predicted or proven null variant                     | 0           | 0          | 0        |                                     |
|                               |            |                                    |                                                                                                 | Variant is <i>de novo</i>                                         | 0           | 0          | 0        |                                     |
|                               |            | Autosomal Recessive Disorder       | Two variants (not predicted/proven null) with some evidence of gene impact in <i>trans</i>      | 0                                                                 | 0           | 0          | 17592081 |                                     |
|                               |            |                                    | Two variants in <i>trans</i> and at least one <i>de novo</i> or a predicted/proven null variant |                                                                   |             |            |          |                                     |
|                               |            | Segregation                        | Candidate gene sequencing                                                                       | 0                                                                 | 0           | 0          | 17592081 |                                     |
|                               |            |                                    | Exome/genome or all genes sequenced in linkage region                                           |                                                                   |             |            |          |                                     |
| Case-Control                  |            | 0                                  | 0                                                                                               | 0                                                                 |             |            |          |                                     |
| <b>Genetic Evidence Total</b> |            |                                    |                                                                                                 | <b>0.5</b>                                                        | <b>0.75</b> | <b>0.5</b> |          |                                     |
| Experimental Evidence         | Case-Level | Functional                         | Functional                                                                                      | Biochemical functions                                             | 1           | 0.5        | 0        | 15007009;17592081<br>12930796       |
|                               |            |                                    |                                                                                                 | Protein interactions                                              |             |            |          |                                     |
|                               |            |                                    |                                                                                                 | Expression                                                        |             |            |          |                                     |
|                               |            | Functional Alteration              | Patient cells                                                                                   | Non-patient cells                                                 | 0.5         | 1.5        | 0.5      | 17592081;20226894                   |
|                               |            |                                    |                                                                                                 | Non-human model organism                                          |             |            |          |                                     |
|                               |            | Models                             | Cell-culture model                                                                              | Rescue in human                                                   | 0           | 0          | 0        |                                     |
|                               |            |                                    |                                                                                                 | Rescue in non-human model organism                                |             |            |          |                                     |
|                               |            | Rescue                             | Rescue in cell culture model                                                                    | Rescue in cell culture model                                      |             |            |          |                                     |
|                               |            |                                    |                                                                                                 | Rescue in patient cells                                           |             |            |          |                                     |
|                               |            |                                    |                                                                                                 | Rescue in patient cells                                           |             |            |          |                                     |
|                               |            | <b>Experimental Evidence Total</b> |                                                                                                 |                                                                   |             | <b>1.5</b> | <b>2</b> | <b>0.5</b>                          |
| <b>Total Points</b>           |            |                                    |                                                                                                 | <b>2</b>                                                          | <b>2.75</b> | <b>1</b>   |          |                                     |
| <b>Summary Classification</b> |            |                                    |                                                                                                 | <b>Disputed</b>                                                   |             |            |          |                                     |

SCN5A

| Evidence Type                 |            |                                    |                                                                                                 | Points Counted                                                    |           |           | PMID                               |                                                                                                |
|-------------------------------|------------|------------------------------------|-------------------------------------------------------------------------------------------------|-------------------------------------------------------------------|-----------|-----------|------------------------------------|------------------------------------------------------------------------------------------------|
|                               |            |                                    |                                                                                                 | G1                                                                | G2        | G3        |                                    |                                                                                                |
| Genetic Evidence              | Case-Level | Variant                            | Autosomal Dominant OR X-linked Disorder                                                         | Proband with other variant type with some evidence of gene impact | 3.5       | 2         | 1                                  | 10377081;24871449;27566755;21076026;26467377;14654377;23963187;12673799;12650885               |
|                               |            |                                    |                                                                                                 | Proband with predicted or proven null variant                     | 0         | 0         | 0                                  |                                                                                                |
|                               |            |                                    |                                                                                                 | Variant is <i>de novo</i>                                         | 6         | 6         | 8                                  |                                                                                                |
|                               |            | Autosomal Recessive Disorder       | Two variants (not predicted/proven null) with some evidence of gene impact in <i>trans</i>      | 0                                                                 | 0         | 0         | 7889574;28782696;10627139;10590249 |                                                                                                |
|                               |            |                                    | Two variants in <i>trans</i> and at least one <i>de novo</i> or a predicted/proven null variant |                                                                   |           |           |                                    |                                                                                                |
|                               |            | Segregation                        | Candidate gene sequencing                                                                       | 1.5                                                               | 1         | 3         | 19841300;10508990                  |                                                                                                |
|                               |            |                                    | Exome/genome or all genes sequenced in linkage region                                           |                                                                   |           |           |                                    |                                                                                                |
| Case-Control                  |            | 1                                  | 3                                                                                               | 1                                                                 |           |           |                                    |                                                                                                |
| <b>Genetic Evidence Total</b> |            |                                    |                                                                                                 | <b>12</b>                                                         | <b>12</b> | <b>12</b> |                                    |                                                                                                |
| Experimental Evidence         | Case-Level | Functional                         | Functional                                                                                      | Biochemical functions                                             | 1         | 0         | 0                                  | 1309946;                                                                                       |
|                               |            |                                    |                                                                                                 | Protein interactions                                              |           |           |                                    |                                                                                                |
|                               |            |                                    |                                                                                                 | Expression                                                        |           |           |                                    |                                                                                                |
|                               |            | Functional Alteration              | Patient cells                                                                                   | Non-patient cells                                                 | 1.5       | 2         | 2                                  | 1309946;<br>23998552;<br>7651517;17698727;21799153;21076026;14654377;10807877;8917568;9495298; |
|                               |            |                                    |                                                                                                 | Non-human model organism                                          |           |           |                                    |                                                                                                |
|                               |            | Models                             | Cell-culture model                                                                              | Rescue in human                                                   | 4         | 4         | 4                                  | 11533705;14736542;17145985                                                                     |
|                               |            |                                    |                                                                                                 | Rescue in non-human model organism                                |           |           |                                    |                                                                                                |
|                               |            | Rescue                             | Rescue in cell culture model                                                                    | Rescue in cell culture model                                      |           |           |                                    |                                                                                                |
|                               |            |                                    |                                                                                                 | Rescue in patient cells                                           |           |           |                                    |                                                                                                |
|                               |            |                                    |                                                                                                 | Rescue in patient cells                                           |           |           |                                    |                                                                                                |
|                               |            | <b>Experimental Evidence Total</b> |                                                                                                 |                                                                   |           | <b>6</b>  | <b>6</b>                           | <b>6</b>                                                                                       |
| <b>Total Points</b>           |            |                                    |                                                                                                 | <b>18</b>                                                         | <b>18</b> | <b>18</b> |                                    |                                                                                                |
| <b>Summary Classification</b> |            |                                    |                                                                                                 | <b>Definitive</b>                                                 |           |           |                                    |                                                                                                |

**SNTA1**

| Summary Classification             |            |                               |                                                                                                 | Points Counted                                                    |            |                       | PMID       |                                     |          |
|------------------------------------|------------|-------------------------------|-------------------------------------------------------------------------------------------------|-------------------------------------------------------------------|------------|-----------------------|------------|-------------------------------------|----------|
|                                    |            |                               |                                                                                                 | G1                                                                | G2         | G3                    |            |                                     |          |
| Genetic Evidence                   | Case-Level | Variant                       | Autosomal Dominant OR X-linked Disorder                                                         | Proband with other variant type with some evidence of gene impact | 0.5        | 0.5                   | 0.75       | 19684871;18591664;27028743          |          |
|                                    |            |                               |                                                                                                 | Proband with predicted or proven null variant                     | 0          | 0                     | 0          |                                     |          |
|                                    |            |                               |                                                                                                 | Variant is <i>de novo</i>                                         | 0          | 0                     | 1          |                                     | 19684871 |
|                                    |            | Autosomal Recessive Disorder  | Two variants (not predicted/proven null) with some evidence of gene impact in <i>trans</i>      | 0                                                                 | 0          | 0                     |            |                                     |          |
|                                    |            |                               | Two variants in <i>trans</i> and at least one <i>de novo</i> or a predicted/proven null variant | 0                                                                 | 0          | 0                     | 19684871   |                                     |          |
|                                    |            | Segregation                   | Candidate gene sequencing                                                                       | 0                                                                 | 0          | 0                     |            |                                     |          |
|                                    |            |                               | Exome/genome or all genes sequenced in linkage region                                           | 0                                                                 | 0          | 0                     |            |                                     |          |
|                                    |            | Case-Control                  |                                                                                                 |                                                                   |            | 0                     | 0          | 0                                   |          |
|                                    |            | <b>Genetic Evidence Total</b> |                                                                                                 |                                                                   |            | <b>0.5</b>            | <b>0.5</b> | <b>1.75</b>                         |          |
|                                    |            | Experimental Evidence         |                                                                                                 | Functional                                                        |            | Biochemical functions | 0.5        | 1.5                                 | 0.5      |
| Protein interactions               |            |                               |                                                                                                 |                                                                   |            |                       |            |                                     |          |
| Expression                         |            |                               |                                                                                                 |                                                                   |            |                       |            |                                     |          |
| Functional Alteration              |            |                               |                                                                                                 | Patient cells                                                     | 2          | 2                     | 1          | 19684871;18591664;27028743;23376825 |          |
|                                    |            |                               |                                                                                                 | Non-patient cells                                                 |            |                       |            |                                     |          |
| Models                             |            |                               |                                                                                                 | Non-human model organism                                          | 0          | 0                     | 0          |                                     |          |
|                                    |            |                               |                                                                                                 | Cell-culture model                                                |            |                       |            |                                     |          |
| Rescue                             |            |                               |                                                                                                 | Rescue in human                                                   | 0          | 0                     | 0          |                                     |          |
|                                    |            |                               |                                                                                                 | Rescue in non-human model organism                                |            |                       |            |                                     |          |
|                                    |            |                               |                                                                                                 | Rescue in cell culture model                                      |            |                       |            |                                     |          |
|                                    |            | Rescue in patient cells       |                                                                                                 |                                                                   |            |                       |            |                                     |          |
| <b>Experimental Evidence Total</b> |            |                               |                                                                                                 | <b>2.5</b>                                                        | <b>3.5</b> | <b>1.5</b>            |            |                                     |          |
| <b>Total Points</b>                |            |                               |                                                                                                 | <b>3</b>                                                          | <b>4</b>   | <b>3.25</b>           |            |                                     |          |
| Summary Classification             |            |                               |                                                                                                 | Disputed                                                          |            |                       |            |                                     |          |

**TRDN**

| Evidence Type                      |            |                               |                                         | Points Counted                                                                                  |             |                       | PMID        |                   |   |
|------------------------------------|------------|-------------------------------|-----------------------------------------|-------------------------------------------------------------------------------------------------|-------------|-----------------------|-------------|-------------------|---|
|                                    |            |                               |                                         | G1                                                                                              | G2          | G3                    |             |                   |   |
| Genetic Evidence                   | Case-Level | Variant                       | Autosomal Dominant OR X-linked Disorder | Proband with other variant type with some evidence of gene impact                               | 0           | 0                     | 0           | 25922419;26768964 |   |
|                                    |            |                               |                                         | Proband with predicted or proven null variant                                                   | 0           | 0                     | 0           |                   |   |
|                                    |            |                               |                                         | Variant is <i>de novo</i>                                                                       | 0           | 0                     | 0           |                   |   |
|                                    |            | Autosomal Recessive Disorder  |                                         | Two variants (not predicted/proven null) with some evidence of gene impact in <i>trans</i>      | 11          | 11.5                  | 3           | 26768964          |   |
|                                    |            |                               |                                         | Two variants in <i>trans</i> and at least one <i>de novo</i> or a predicted/proven null variant | 0           | 0                     | 0           |                   |   |
|                                    |            | Segregation                   |                                         | Candidate gene sequencing                                                                       | 0           | 0                     | 0           |                   |   |
|                                    |            |                               |                                         | Exome/genome or all genes sequenced in linkage region                                           | 0           | 0                     | 0           |                   |   |
|                                    |            | Case-Control                  |                                         |                                                                                                 |             | 0                     | 0           |                   | 0 |
|                                    |            | <b>Genetic Evidence Total</b> |                                         |                                                                                                 |             | <b>11</b>             | <b>11.5</b> | <b>3</b>          |   |
|                                    |            | Experimental Evidence         |                                         | Functional                                                                                      |             | Biochemical functions | 0           | 0                 | 0 |
| Protein interactions               |            |                               |                                         |                                                                                                 |             |                       |             |                   |   |
| Expression                         |            |                               |                                         |                                                                                                 |             |                       |             |                   |   |
| Functional Alteration              |            |                               |                                         | Patient cells                                                                                   | 0           | 0                     | 0           |                   |   |
|                                    |            |                               |                                         | Non-patient cells                                                                               |             |                       |             |                   |   |
| Models                             |            |                               |                                         | Non-human model organism                                                                        | 0           | 0                     | 0           |                   |   |
|                                    |            |                               |                                         | Cell-culture model                                                                              |             |                       |             |                   |   |
| Rescue                             |            |                               |                                         | Rescue in human                                                                                 | 0           | 0                     | 0           |                   |   |
|                                    |            |                               |                                         | Rescue in non-human model organism                                                              |             |                       |             |                   |   |
|                                    |            |                               |                                         | Rescue in cell culture model                                                                    |             |                       |             |                   |   |
|                                    |            | Rescue in patient cells       |                                         |                                                                                                 |             |                       |             |                   |   |
| <b>Experimental Evidence Total</b> |            |                               |                                         | <b>0</b>                                                                                        | <b>0</b>    | <b>0</b>              |             |                   |   |
| <b>Total Points</b>                |            |                               |                                         | <b>11</b>                                                                                       | <b>11.5</b> | <b>3</b>              |             |                   |   |
| Summary Classification             |            |                               |                                         | Strong                                                                                          |             |                       |             |                   |   |

## **Supplemental references**

### ***AKAP9***

1. Marx SO, Kurokawa J, Reiken S, et al. Requirement of a macromolecular signaling complex for beta adrenergic receptor modulation of the KCNQ1-KCNE1 potassium channel. *Science* 2002;295:496-469.
2. Chen L, Marquardt ML, Tester DJ, Sampson KJ, Ackerman MJ, Kass RS. Mutation of an A-kinase-anchoring protein causes long-QT syndrome. *Proc Natl Acad Sci U S A* 2007;104:20990-20995.
3. Li Y, Chen L, Kass RS, Dessauer CW. The A-kinase anchoring protein Yotiao facilitates complex formation between adenylyl cyclase type 9 and the IKs potassium channel in heart. *J Biol Chem* 2012;287:29815-29824.
4. Dvir M, Strulovich R, Sachyani D, et al. Long QT mutations at the interface between KCNQ1 helix C and KCNE1 disrupt I(KS) regulation by PKA and PIP(2). *J Cell Sci* 2014;127:3943-3955.
5. Shigemizu D, Aiba T, Nakagawa H, et al. Exome Analyses of Long QT Syndrome Reveal Candidate Pathogenic Mutations in Calmodulin-Interacting Genes. *PLoS One* 2015;10:e0130329.
6. Jimenez-Jaimez J, Peinado R, Grima EZ, et al. Diagnostic Approach to Unexplained Cardiac Arrest (from the FIVI-Gen Study). *Am J Cardiol* 2015;116:894-899.
7. Maltese PE, Orlova N, Krasikova E, et al. Gene-Targeted Analysis of Clinically Diagnosed Long QT Russian Families. *Int Heart J* 2017;58:81-87.
8. Neubauer J, Lecca MR, Russo G, et al. Exome analysis in 34 sudden unexplained death (SUD) victims mainly identified variants in channelopathy-associated genes. *Int J Legal Med* 2018;132:1057-1065.

### ***ANK2***

9. Tuvia S, Buhusi M, Davis L, Reedy M, Bennett V. Ankyrin-B is required for intracellular sorting of structurally diverse Ca<sup>2+</sup> homeostasis proteins. *J Cell Biol* 1999;147:995-1008.
10. Mohler PJ, Schott JJ, Gramolini AO, et al. Ankyrin-B mutation causes type 4 long-QT cardiac arrhythmia and sudden cardiac death. *Nature* 2003;421:634-639.
11. Mohler PJ, Splawski I, Napolitano C, et al. A cardiac arrhythmia syndrome caused by loss of ankyrin-B function. *Proc Natl Acad Sci U S A* 2004;101:9137-9142.
12. Sherman J, Tester DJ, Ackerman MJ. Targeted mutational analysis of ankyrin-B in 541 consecutive, unrelated patients referred for long QT syndrome genetic testing and 200 healthy subjects. *Heart Rhythm* 2005;2:1218-1223.
13. Zhou X, Shimizu M, Konno T, et al. Analysis of ankyrin-B gene mutations in patients with long QT syndrome. *Nan Fang Yi Ke Da Xue Xue Bao* 2006;26:901-903.

14. Mohler PJ, Le Scouarnec S, Denjoy I, et al. Defining the cellular phenotype of "ankyrin-B syndrome" variants: human ANK2 variants associated with clinical phenotypes display a spectrum of activities in cardiomyocytes. *Circulation* 2007;115:432-441.
15. Shigemizu D, Aiba T, Nakagawa H, et al. Exome Analyses of Long QT Syndrome Reveal Candidate Pathogenic Mutations in Calmodulin-Interacting Genes. *PLoS One* 2015;10:e0130329.
16. Ichikawa M, Aiba T, Ohno S, et al. Phenotypic Variability of ANK2 Mutations in Patients With Inherited Primary Arrhythmia Syndromes. *Circ J* 2016;80:2435-2442.
17. Swayne LA, Murphy NP, Asuri S, et al. Novel Variant in the ANK2 Membrane-Binding Domain Is Associated With Ankyrin-B Syndrome and Structural Heart Disease in a First Nations Population With a High Rate of Long QT Syndrome. *Circ Cardiovasc Genet* 2017;10: e001537.
18. Maltese PE, Orlova N, Krasikova E, et al. Gene-Targeted Analysis of Clinically Diagnosed Long QT Russian Families. *Int Heart J* 2017;58:81-87.

### ***CACNA1C***

19. Splawski I, Timothy KW, Decher N, et al. Severe arrhythmia disorder caused by cardiac L-type calcium channel mutations. *Proc Natl Acad Sci U S A* 2005;102:8089-8096.
20. Boczek NJ, Best JM, Tester DJ, et al. Exome sequencing and systems biology converge to identify novel mutations in the L-type calcium channel, *CACNA1C*, linked to autosomal dominant long QT syndrome. *Circ Cardiovasc Genet* 2013;6:279-289.
21. Fukuyama M, Wang Q, Kato K, et al. Long QT syndrome type 8: novel *CACNA1C* mutations causing QT prolongation and variant phenotypes. *Europace* 2014;16:1828-1837.
22. Wemhoner K, Friedrich C, Stallmeyer B, et al. Gain-of-function mutations in the calcium channel *CACNA1C* (*Cav1.2*) cause non-syndromic long-QT but not Timothy syndrome. *J Mol Cell Cardiol* 2015;80:186-195.
23. Landstrom AP, Boczek NJ, Ye D, et al. Novel long QT syndrome-associated missense mutation, L762F, in *CACNA1C*-encoded L-type calcium channel imparts a slower inactivation tau and increased sustained and window current. *Int J Cardiol* 2016;220:290-298.

### ***CALM1***

24. Shamgar L, Ma L, Schmitt N, et al. Calmodulin is essential for cardiac IKS channel gating and assembly: impaired function in long-QT mutations. *Circ Res* 2006;98:1055-1063.
25. Crotti L, Johnson CN, Graf E, et al. Calmodulin mutations associated with recurrent cardiac arrest in infants. *Circulation* 2013;127:1009-1017.



26. Marsman RF, Barc J, Beekman L, et al. A mutation in CALM1 encoding calmodulin in familial idiopathic ventricular fibrillation in childhood and adolescence. *J Am Coll Cardiol* 2014;63:259-266.
27. Limpitikul WB, Dick IE, Joshi-Mukherjee R, Overgaard MT, George AL, Jr., Yue DT. Calmodulin mutations associated with long QT syndrome prevent inactivation of cardiac L-type Ca<sup>2+</sup> currents and promote proarrhythmic behavior in ventricular myocytes. *J Mol Cell Cardiol* 2014;74:115-124.
28. Sondergaard MT, Tian X, Liu Y, et al. Arrhythmogenic Calmodulin Mutations Affect the Activation and Termination of Cardiac Ryanodine Receptor-mediated Ca<sup>2+</sup> Release. *J Biol Chem* 2015;290:26151-26162.
29. Boczek NJ, Gomez-Hurtado N, Ye D, et al. Spectrum and Prevalence of CALM1-, CALM2-, and CALM3-Encoded Calmodulin Variants in Long QT Syndrome and Functional Characterization of a Novel Long QT Syndrome-Associated Calmodulin Missense Variant, E141G. *Circ Cardiovasc Genet* 2016;9:136-146.
30. Pipilas DC, Johnson CN, Webster G, et al. Novel calmodulin mutations associated with congenital long QT syndrome affect calcium current in human cardiomyocytes. *Heart Rhythm* 2016;13:2012-2019.
31. Rocchetti M, Sala L, Dreizehnter L, et al. Elucidating arrhythmogenic mechanisms of long-QT syndrome CALM1-F142L mutation in patient-specific induced pluripotent stem cell-derived cardiomyocytes. *Cardiovasc Res* 2017;113:531-541.
32. Crotti L, Spazzolini C, Tester DJ, Ghidoni A, Baruteau AE, Beckmann BM, Behr ER, Bennett JS, Bezzina CR, Bhuiyan ZA, Celiker A, Cerrone M, Dagradi F, De Ferrari GM, Etheridge SP, Fatah M, Garcia-Pavia P, Al-Ghamdi S, Hamilton RM, Al-Hassnan ZN, Horie M, Jimenez-Jaimez J, Kanter RJ, Kaski JP, Kotta MC, Lahrouchi N, Makita N, Norrish G, Odland HH, Ohno S, Papagiannis J, Parati G, Sekarski N, Tveten K, Vatta M, Webster G, Wilde AAM, Wojciak J, George AL, Ackerman MJ and Schwartz PJ. Calmodulin mutations and life-threatening cardiac arrhythmias: insights from the International Calmodulinopathy Registry. *Eur Heart J*. 2019;40: 2964-2975.

## ***CALM2***

33. Shamgar L, Ma L, Schmitt N, et al. Calmodulin is essential for cardiac IKS channel gating and assembly: impaired function in long-QT mutations. *Circ Res* 2006;98:1055-1063.
34. Crotti L, Johnson CN, Graf E, et al. Calmodulin mutations associated with recurrent cardiac arrest in infants. *Circulation* 2013;127:1009-1017.
35. Makita N, Yagihara N, Crotti L, et al. Novel calmodulin mutations associated with congenital arrhythmia susceptibility. *Circ Cardiovasc Genet* 2014;7:466-474.
36. Yin G, Hassan F, Haroun AR, et al. Arrhythmogenic calmodulin mutations disrupt intracellular cardiomyocyte Ca<sup>2+</sup> regulation by distinct mechanisms. *J Am Heart Assoc* 2014;3:e000996.

37. Limpitikul WB, Dick IE, Joshi-Mukherjee R, Overgaard MT, George AL, Jr., Yue DT. Calmodulin mutations associated with long QT syndrome prevent inactivation of cardiac L-type Ca<sup>2+</sup> currents and promote proarrhythmic behavior in ventricular myocytes. *J Mol Cell Cardiol* 2014;74:115-124.
38. Sondergaard MT, Tian X, Liu Y, et al. Arrhythmogenic Calmodulin Mutations Affect the Activation and Termination of Cardiac Ryanodine Receptor-mediated Ca<sup>2+</sup> Release. *J Biol Chem* 2015;290:26151-26162.
39. Boczek NJ, Gomez-Hurtado N, Ye D, et al. Spectrum and Prevalence of CALM1-, CALM2-, and CALM3-Encoded Calmodulin Variants in Long QT Syndrome and Functional Characterization of a Novel Long QT Syndrome-Associated Calmodulin Missense Variant, E141G. *Circ Cardiovasc Genet* 2016;9:136-146.
40. Pipilas DC, Johnson CN, Webster G, et al. Novel calmodulin mutations associated with congenital long QT syndrome affect calcium current in human cardiomyocytes. *Heart Rhythm* 2016;13:2012-2019.
41. Sun J, MacKinnon R. Cryo-EM Structure of a KCNQ1/CaM Complex Reveals Insights into Congenital Long QT Syndrome. *Cell* 2017;169:1042-1050.
42. Yamamoto Y, Makiyama T, Harita T, et al. Allele-specific ablation rescues electrophysiological abnormalities in a human iPSC cell model of long-QT syndrome with a CALM2 mutation. *Hum Mol Genet* 2017;26:1670-1677.
43. Limpitikul WB, Dick IE, Tester DJ, et al. A Precision Medicine Approach to the Rescue of Function on Malignant Calmodulinopathic Long-QT Syndrome. *Circ Res* 2017;120:39-48.
44. Crotti L, Spazzolini C, Tester DJ, Ghidoni A, Baruteau AE, Beckmann BM, Behr ER, Bennett JS, Bezzina CR, Bhuiyan ZA, Celiker A, Cerrone M, Dagradi F, De Ferrari GM, Etheridge SP, Fatah M, Garcia-Pavia P, Al-Ghamdi S, Hamilton RM, Al-Hassnan ZN, Horie M, Jimenez-Jaimez J, Kanter RJ, Kaski JP, Kotta MC, Lahrouchi N, Makita N, Norrish G, Odland HH, Ohno S, Papagiannis J, Parati G, Sekarski N, Tveten K, Vatta M, Webster G, Wilde AAM, Wojciak J, George AL, Ackerman MJ and Schwartz PJ. Calmodulin mutations and life-threatening cardiac arrhythmias: insights from the International Calmodulinopathy Registry. *Eur Heart J*. 2019;40: 2964-2975.

### ***CALM3***

45. Shamgar L, Ma L, Schmitt N, et al. Calmodulin is essential for cardiac IKS channel gating and assembly: impaired function in long-QT mutations. *Circ Res* 2006;98:1055-1063.
46. Crotti L, Johnson CN, Graf E, et al. Calmodulin mutations associated with recurrent cardiac arrest in infants. *Circulation* 2013;127:1009-1017.
47. Reed GJ, Boczek NJ, Etheridge SP, Ackerman MJ. CALM3 mutation associated with long QT syndrome. *Heart Rhythm* 2015;12:419-422.
48. Chaix MA, Koopmann TT, Goyette P, et al. Novel CALM3 mutations in pediatric long QT syndrome patients support a CALM3-specific calmodulinopathy. *HeartRhythm Case Rep* 2016;2:250-254.

49. Boczek NJ, Gomez-Hurtado N, Ye D, et al. Spectrum and Prevalence of CALM1-, CALM2-, and CALM3-Encoded Calmodulin Variants in Long QT Syndrome and Functional Characterization of a Novel Long QT Syndrome-Associated Calmodulin Missense Variant, E141G. *Circ Cardiovasc Genet* 2016;9:136-146.
50. Crotti L, Spazzolini C, Tester DJ, Ghidoni A, Baruteau AE, Beckmann BM, Behr ER, Bennett JS, Bezzina CR, Bhuiyan ZA, Celiker A, Cerrone M, Dagradi F, De Ferrari GM, Etheridge SP, Fatah M, Garcia-Pavia P, Al-Ghamdi S, Hamilton RM, Al-Hassnan ZN, Horie M, Jimenez-Jaimez J, Kanter RJ, Kaski JP, Kotta MC, Lahrouchi N, Makita N, Norrish G, Odland HH, Ohno S, Papagiannis J, Parati G, Sekarski N, Tveten K, Vatta M, Webster G, Wilde AAM, Wojciak J, George AL, Ackerman MJ and Schwartz PJ. Calmodulin mutations and life-threatening cardiac arrhythmias: insights from the International Calmodulinopathy Registry. *Eur Heart J*. 2019;40: 2964-2975.

### ***CAV3***

51. Cagliani R, Bresolin N, Prella A, et al. A CAV3 microdeletion differentially affects skeletal muscle and myocardium. *Neurology* 2003;61:1513-1519.
52. Vatta M, Ackerman MJ, Ye B, et al. Mutant caveolin-3 induces persistent late sodium current and is associated with long-QT syndrome. *Circulation* 2006;114:2104-2112.
53. Cronk LB, Ye B, Kaku T, et al. Novel mechanism for sudden infant death syndrome: persistent late sodium current secondary to mutations in caveolin-3. *Heart Rhythm* 2007;4:161-166.
54. Hedley PL, Kanters JK, Dembic M, et al. The role of CAV3 in long-QT syndrome: clinical and functional assessment of a caveolin-3/Kv11.1 double heterozygote versus caveolin-3 single heterozygote. *Circ Cardiovasc Genet* 2013;6:452-461.
55. Vaidyanathan R, Vega AL, Song C, et al. The interaction of caveolin 3 protein with the potassium inward rectifier channel Kir2.1: physiology and pathology related to long qt syndrome 9 (LQT9). *J Biol Chem* 2013;288:17472-17480.
56. Cheng J, Valdivia CR, Vaidyanathan R, Balijepalli RC, Ackerman MJ, Makielski JC. Caveolin-3 suppresses late sodium current by inhibiting nNOS-dependent S-nitrosylation of SCN5A. *J Mol Cell Cardiol* 2013;61:102-110.
57. Lariccia V, Nasti AA, Alessandrini F, et al. Identification and functional analysis of a new putative caveolin-3 variant found in a patient with sudden unexplained death. *J Biomed Sci* 2014;21:58.
58. Shigemizu D, Aiba T, Nakagawa H, et al. Exome Analyses of Long QT Syndrome Reveal Candidate Pathogenic Mutations in Calmodulin-Interacting Genes. *PLoS One* 2015;10:e0130329.

### ***KCNE1***

59. Takumi T, Moriyoshi K, Aramori I, et al. Alteration of channel activities and gating by mutations of slow ISK potassium channel. *J Biol Chem* 1991;266:22192-22198.

60. Splawski I, Tristani-Firouzi M, Lehmann MH, Sanguinetti MC, Keating MT. Mutations in the hminK gene cause long QT syndrome and suppress IKs function. *Nat Genet* 1997;17:338-340.
61. Schulze-Bahr E, Wang Q, Wedekind H, et al. KCNE1 mutations cause jervell and Lange-Nielsen syndrome. *Nat Genet* 1997;17:267-268.
62. Romey G, Attali B, Chouabe C, et al. Molecular mechanism and functional significance of the MinK control of the KvLQT1 channel activity. *J Biol Chem* 1997;272:16713-16716.
63. Duggal P, Vesely MR, Wattanasirichaigoon D, Villafane J, Kaushik V, Beggs AH. Mutation of the gene for IsK associated with both Jervell and Lange-Nielsen and Romano-Ward forms of Long-QT syndrome. *Circulation* 1998;97:142-146.
64. Bianchi L, Shen Z, Dennis AT, et al. Cellular dysfunction of LQT5-minK mutants: abnormalities of IKs, IKr and trafficking in long QT syndrome. *Hum Mol Genet* 1999;8:1499-1507.
65. Hoppe UC, Marban E, Johns DC. Distinct gene-specific mechanisms of arrhythmia revealed by cardiac gene transfer of two long QT disease genes, HERG and KCNE1. *Proc Natl Acad Sci U S A* 2001;98:5335-5340.
66. Ma L, Lin C, Teng S, et al. Characterization of a novel Long QT syndrome mutation G52R-KCNE1 in a Chinese family. *Cardiovasc Res* 2003;59:612-619.
67. Lai LP, Su YN, Hsieh FJ, et al. Denaturing high-performance liquid chromatography screening of the long QT syndrome-related cardiac sodium and potassium channel genes and identification of novel mutations and single nucleotide polymorphisms. *J Hum Genet* 2005;50:490-496.
68. Wu DM, Lai LP, Zhang M, et al. Characterization of an LQT5-related mutation in KCNE1, Y81C: implications for a role of KCNE1 cytoplasmic domain in IKs channel function. *Heart Rhythm* 2006;3:1031-1040.
69. Ohno S, Zankov DP, Yoshida H, et al. N- and C-terminal KCNE1 mutations cause distinct phenotypes of long QT syndrome. *Heart Rhythm* 2007;4:332-340.
70. Harmer SC, Wilson AJ, Aldridge R, Tinker A. Mechanisms of disease pathogenesis in long QT syndrome type 5. *Am J Physiol Cell Physiol* 2010;298:C263-273.
71. Zheng R, Thompson K, Obeng-Gyimah E, et al. Analysis of the interactions between the C-terminal cytoplasmic domains of KCNQ1 and KCNE1 channel subunits. *Biochem J* 2010;428:75-84.
72. Nof E, Barajas-Martinez H, Eldar M, et al. LQT5 masquerading as LQT2: a dominant negative effect of KCNE1-D85N rare polymorphism on KCNH2 current. *Europace* 2011;13:1478-1483.
73. Major P, Baczko I, Hiripi L, et al. A novel transgenic rabbit model with reduced repolarization reserve: long QT syndrome caused by a dominant-negative mutation of the KCNE1 gene. *Br J Pharmacol* 2016;173:2046-2061.
74. Marcondes L, Crawford J, Earle N, et al. Long QT molecular autopsy in sudden unexplained death in the young (1-40 years old): Lessons learnt from an eight year experience in New Zealand. *PLoS One* 2018;13:e0196078.
75. Lane CM, Giudicessi JR, Ye D, et al. Long QT syndrome type 5-Lite: Defining the clinical phenotype associated with the potentially proarrhythmic p.Asp85Asn-KCNE1 common genetic variant. *Heart Rhythm* 2018;15:1223-1230.

## ***KCNE2***

76. Abbott GW, Sesti F, Splawski I, et al. MiRP1 forms IKr potassium channels with HERG and is associated with cardiac arrhythmia. *Cell* 1999;97:175-187.
77. Tinel N, Diochot S, Borsotto M, Lazdunski M, Barhanin J. KCNE2 confers background current characteristics to the cardiac KCNQ1 potassium channel. *EMBO J* 2000;19:6326-6330.
78. Isbrandt D, Friederich P, Solth A, et al. Identification and functional characterization of a novel KCNE2 (MiRP1) mutation that alters HERG channel kinetics. *J Mol Med (Berl)* 2002;80:524-532.
79. Weerapura M, Nattel S, Chartier D, Caballero R, Hebert TE. A comparison of currents carried by HERG, with and without coexpression of MiRP1, and the native rapid delayed rectifier current. Is MiRP1 the missing link? *J Physiol* 2002;540:15-27.
80. Lu Y, Mahaut-Smith MP, Huang CL, Vandenberg JI. Mutant MiRP1 subunits modulate HERG K<sup>+</sup> channel gating: a mechanism for pro-arrhythmia in long QT syndrome type 6. *J Physiol* 2003;551:253-262.
81. Qu J, Kryukova Y, Potapova IA, et al. MiRP1 modulates HCN2 channel expression and gating in cardiac myocytes. *J Biol Chem* 2004;279:43497-43502.
82. Gordon E, Panaghie G, Deng L, et al. A KCNE2 mutation in a patient with cardiac arrhythmia induced by auditory stimuli and serum electrolyte imbalance. *Cardiovasc Res* 2008;77:98-106.
83. Nawathe PA, Kryukova Y, Oren RV, et al. An LQTS6 MiRP1 mutation suppresses pacemaker current and is associated with sinus bradycardia. *J Cardiovasc Electrophysiol* 2013;24:1021-1027.
84. Aziz PF, Wieand TS, Ganley J, Henderson J, McBride M, Shah MJ. Do LQTS gene single nucleotide polymorphisms alter QTc intervals at rest and during exercise stress testing? *Ann Noninvasive Electrocardiol* 2013;18:288-293.
85. Roberts JD, Krahn AD, Ackerman MJ, et al. Loss-of-Function KCNE2 Variants: True Monogenic Culprits of Long-QT Syndrome or Proarrhythmic Variants Requiring Secondary Provocation? *Circ Arrhythm Electrophysiol* 2017;10:e005282.

## ***KCNH2***

86. Sanguinetti MC, Jiang C, Curran ME, Keating MT. A mechanistic link between an inherited and an acquired cardiac arrhythmia: HERG encodes the IKr potassium channel. *Cell* 1995;81:299-307.
87. Wymore RS, Gintant GA, Wymore RT, Dixon JE, McKinnon D, Cohen IS. Tissue and species distribution of mRNA for the IKr-like K<sup>+</sup> channel, *erg*. *Circ Res* 1997;80:261-268.
88. Kagan A, Yu Z, Fishman GI, McDonald TV. The dominant negative LQT2 mutation A561V reduces wild-type HERG expression. *J Biol Chem* 2000;275:11241-11248.

89. Tenenbaum M, Lavi S, Magal N, et al. Identification of the gene causing long QT syndrome in an Israeli family. *Isr Med Assoc J* 2008;10:809-811.
90. Splawski I, Shen J, Timothy KW, et al. Spectrum of mutations in long-QT syndrome genes. KVLQT1, HERG, SCN5A, KCNE1, and KCNE2. *Circulation* 2000;102:1178-1185.
91. Lees-Miller JP, Guo J, Somers JR, et al. Selective knockout of mouse ERG1 B potassium channel eliminates I(Kr) in adult ventricular myocytes and elicits episodes of abrupt sinus bradycardia. *Mol Cell Biol* 2003;23:1856-1862.
92. Tester DJ, Will ML, Haglund CM, Ackerman MJ. Compendium of cardiac channel mutations in 541 consecutive unrelated patients referred for long QT syndrome genetic testing. *Heart Rhythm* 2005;2:507-517.
93. Gong Q, Keeney DR, Molinari M, Zhou Z. Degradation of trafficking-defective long QT syndrome type II mutant channels by the ubiquitin-proteasome pathway. *J Biol Chem* 2005;280:19419-19425.
94. Anderson CL, Delisle BP, Anson BD, et al. Most LQT2 mutations reduce Kv11.1 (hERG) current by a class 2 (trafficking-deficient) mechanism. *Circulation* 2006;113:365-373.
95. Amin AS, Herfst LJ, Delisle BP, et al. Fever-induced QTc prolongation and ventricular arrhythmias in individuals with type 2 congenital long QT syndrome. *J Clin Invest* 2008;118:2552-2561.
96. Kim JA, Lopes CM, Moss AJ, et al. Trigger-specific risk factors and response to therapy in long QT syndrome type 2. *Heart Rhythm* 2010;7:1797-1805.
97. Kapa S, Tester DJ, Salisbury BA, et al. Genetic testing for long-QT syndrome: distinguishing pathogenic mutations from benign variants. *Circulation* 2009;120:1752-1760.
98. Itzhaki I, Maizels L, Huber I, et al. Modelling the long QT syndrome with induced pluripotent stem cells. *Nature* 2011;471:225-229.
99. Amoros I, Jimenez-Jaimez J, Tercedor L, et al. Functional effects of a missense mutation in HERG associated with type 2 long QT syndrome. *Heart Rhythm* 2011;8:463-470.
100. Gianulis EC, Trudeau MC. Rescue of aberrant gating by a genetically encoded PAS (Per-Arnt-Sim) domain in several long QT syndrome mutant human ether-a-go-go-related gene potassium channels. *J Biol Chem* 2011;286:22160-22169.
101. Meder B, Scholz EP, Hassel D, et al. Reconstitution of defective protein trafficking rescues Long-QT syndrome in zebrafish. *Biochem Biophys Res Commun* 2011;408:218-224.
102. Stump MR, Gong Q, Zhou Z. LQT2 nonsense mutations generate trafficking defective NH2-terminally truncated channels by the reinitiation of translation. *Am J Physiol Heart Circ Physiol* 2013;305:H1397-404.
103. Jou CJ, Barnett SM, Bian JT, Weng HC, Sheng X, Tristani-Firouzi M. An in vivo cardiac assay to determine the functional consequences of putative long QT syndrome mutations. *Circ Res* 2013;112:826-830.
104. Bellin M, Casini S, Davis RP, et al. Isogenic human pluripotent stem cell pairs reveal the role of a KCNH2 mutation in long-QT syndrome. *EMBO J* 2013;32:3161-3175.

105. Christiansen M, Hedley PL, Theilade J, et al. Mutations in Danish patients with long QT syndrome and the identification of a large founder family with p.F29L in KCNH2. *BMC Med Genet* 2014;15:31.
106. Mura M, Mehta A, Ramachandra CJ, et al. The KCNH2-IVS9-28A/G mutation causes aberrant isoform expression and hERG trafficking defect in cardiomyocytes derived from patients affected by Long QT Syndrome type 2. *Int J Cardiol* 2017;240:367-371.

### ***KCNJ2***

107. Plaster NM, Tawil R, Tristani-Firouzi M, et al. Mutations in Kir2.1 cause the developmental and episodic electrical phenotypes of Andersen's syndrome. *Cell* 2001;105:511-519.
108. Andelfinger G, Tapper AR, Welch RC, Vanoye CG, George AL, Jr., Benson DW. KCNJ2 mutation results in Andersen syndrome with sex-specific cardiac and skeletal muscle phenotypes. *Am J Hum Genet* 2002;71:663-668.
109. Fodstad H, Swan H, Auberson M, et al. Loss-of-function mutations of the K(+) channel gene KCNJ2 constitute a rare cause of long QT syndrome. *J Mol Cell Cardiol* 2004;37:593-602.
110. Bendahhou S, Fournier E, Sternberg D, et al. In vivo and in vitro functional characterization of Andersen's syndrome mutations. *J Physiol* 2005;565:731-741.
111. Ballester LY, Benson DW, Wong B, et al. Trafficking-competent and trafficking-defective KCNJ2 mutations in Andersen syndrome. *Hum Mutat* 2006;27:388.
112. Lu CW, Lin JH, Rajawat YS, et al. Functional and clinical characterization of a mutation in KCNJ2 associated with Andersen-Tawil syndrome. *J Med Genet* 2006;43:653-659.
113. Tani Y, Miura D, Kurokawa J, et al. T75M-KCNJ2 mutation causing Andersen-Tawil syndrome enhances inward rectification by changing Mg<sup>2+</sup> sensitivity. *J Mol Cell Cardiol* 2007;43:187-196.
114. Chan HF, Chen ML, Su JJ, Ko LC, Lin CH, Wu RM. A novel neuropsychiatric phenotype of KCNJ2 mutation in one Taiwanese family with Andersen-Tawil syndrome. *J Hum Genet* 2010;55:186-188.
115. Doi T, Makiyama T, Morimoto T, et al. A novel KCNJ2 nonsense mutation, S369X, impedes trafficking and causes a limited form of Andersen-Tawil syndrome. *Circ Cardiovasc Genet* 2011;4:253-260.
116. Barajas-Martinez H, Hu D, Ontiveros G, et al. Biophysical and molecular characterization of a novel de novo KCNJ2 mutation associated with Andersen-Tawil syndrome and catecholaminergic polymorphic ventricular tachycardia mimicry. *Circ Cardiovasc Genet* 2011;4:51-57.
117. Kimura H, Zhou J, Kawamura M, et al. Phenotype variability in patients carrying KCNJ2 mutations. *Circ Cardiovasc Genet* 2012;5:344-353.
118. Limberg MM, Zumhagen S, Netter MF, et al. Non dominant-negative KCNJ2 gene mutations leading to Andersen-Tawil syndrome with an isolated cardiac phenotype. *Basic Res Cardiol* 2013;108:353.

119. Marquis-Nicholson R, Prosser DO, Love JM, et al. Array comparative genomic hybridization identifies a heterozygous deletion of the entire KCNJ2 gene as a cause of sudden cardiac death. *Circ Cardiovasc Genet* 2014;7:17-22.
120. Maltese PE, Orlova N, Krasikova E, et al. Gene-Targeted Analysis of Clinically Diagnosed Long QT Russian Families. *Int Heart J* 2017;58:81-87.
121. Scheiper S, Hertel B, Beckmann BM, Kaab S, Thiel G, Kaufenstein S. Characterization of a novel KCNJ2 sequence variant detected in Andersen-Tawil syndrome patients. *BMC Med Genet* 2017;18:113.

### ***KCNJ5***

122. Yang Y, Yang Y, Liang B, et al. Identification of a Kir3.4 mutation in congenital long QT syndrome. *Am J Hum Genet* 2010;86:872-880.
123. Wang F, Liu J, Hong L, et al. The phenotype characteristics of type 13 long QT syndrome with mutation in KCNJ5 (Kir3.4-G387R). *Heart Rhythm* 2013;10:1500-1506.
124. Bond R, Blaufox A, Goldner B, Patel A. Congenital long QT syndrome: a case report of LQT2 and LQT13 in a neonate. *Europace* 2014;16:1807.
125. Liang B, Nissen JD, Laursen M, et al. G-protein-coupled inward rectifier potassium current contributes to ventricular repolarization. *Cardiovasc Res* 2014;101:175-184.
126. Kokunai Y, Nakata T, Furuta M, et al. A Kir3.4 mutation causes Andersen-Tawil syndrome by an inhibitory effect on Kir2.1. *Neurology* 2014;82:1058-1064.

### ***KCNQ1***

127. Wang Q, Curran ME, Splawski I, et al. Positional cloning of a novel potassium channel gene: KVLQT1 mutations cause cardiac arrhythmias. *Nat Genet* 1996;12:17-23.
128. Russell MW, Dick M, 2nd, Collins FS, Brody LC. KVLQT1 mutations in three families with familial or sporadic long QT syndrome. *Hum Mol Genet* 1996;5:1319-1324.
129. Sanguinetti MC, Curran ME, Zou A, et al. Coassembly of K(V)LQT1 and minK (IsK) proteins to form cardiac I(Ks) potassium channel. *Nature* 1996;384:80-83.
130. Yang WP, Levesque PC, Little WA, Conder ML, Shalaby FY, Blannar MA. KvLQT1, a voltage-gated potassium channel responsible for human cardiac arrhythmias. *Proc Natl Acad Sci U S A* 1997;94:4017-4021.
131. Shalaby FY, Levesque PC, Yang WP, et al. Dominant-negative KvLQT1 mutations underlie the LQT1 form of long QT syndrome. *Circulation* 1997;96:1733-1736.



132. Chouabe C, Neyroud N, Guicheney P, Lazdunski M, Romey G, Barhanin J. Properties of KvLQT1 K<sup>+</sup> channel mutations in Romano-Ward and Jervell and Lange-Nielsen inherited cardiac arrhythmias. *EMBO J* 1997;16:5472-5479.
133. Jongbloed RJ, Wilde AA, Geelen JL, et al. Novel KCNQ1 and HERG missense mutations in Dutch long-QT families. *Hum Mutat* 1999;13:301-310.
134. Piippo K, Swan H, Pasternack M, et al. A founder mutation of the potassium channel KCNQ1 in long QT syndrome: implications for estimation of disease prevalence and molecular diagnostics. *J Am Coll Cardiol* 2001;37:562-568.
135. Aizawa Y, Ueda K, Wu LM, et al. Truncated KCNQ1 mutant, A178fs/105, forms hetero-multimer channel with wild-type causing a dominant-negative suppression due to trafficking defect. *FEBS Lett* 2004;574:145-150.
136. Casimiro MC, Knollmann BC, Yamoah EN, et al. Targeted point mutagenesis of mouse *Kcnq1*: phenotypic analysis of mice with point mutations that cause Romano-Ward syndrome in humans. *Genomics* 2004;84:555-564.
137. Thomas D, Wimmer AB, Karle CA, et al. Dominant-negative I(Ks) suppression by KCNQ1-deltaF339 potassium channels linked to Romano-Ward syndrome. *Cardiovasc Res* 2005;67:487-497.
138. Brink PA, Crotti L, Corfield V, et al. Phenotypic variability and unusual clinical severity of congenital long-QT syndrome in a founder population. *Circulation* 2005;112:2602-2610.
139. Aizawa Y, Ueda K, Scornik F, et al. A novel mutation in KCNQ1 associated with a potent dominant negative effect as the basis for the LQT1 form of the long QT syndrome. *J Cardiovasc Electrophysiol* 2007;18:972-977.
140. Ocorr K, Reeves NL, Wessells RJ, et al. KCNQ potassium channel mutations cause cardiac arrhythmias in *Drosophila* that mimic the effects of aging. *Proc Natl Acad Sci U S A* 2007;104:3943-3948.
141. Brunner M, Peng X, Liu GX, et al. Mechanisms of cardiac arrhythmias and sudden death in transgenic rabbits with long QT syndrome. *J Clin Invest* 2008;118:2246-2259.
142. Kapa S, Tester DJ, Salisbury BA, et al. Genetic testing for long-QT syndrome: distinguishing pathogenic mutations from benign variants. *Circulation* 2009;120:1752-1760.
143. Moretti A, Bellin M, Welling A, et al. Patient-specific induced pluripotent stem-cell models for long-QT syndrome. *N Engl J Med* 2010;363:1397-1409.
144. Eldstrom J, Xu H, Werry D, et al. Mechanistic basis for LQT1 caused by S3 mutations in the KCNQ1 subunit of IKs. *J Gen Physiol* 2010;135:433-448.
145. Egashira T, Yuasa S, Suzuki T, et al. Disease characterization using LQTS-specific induced pluripotent stem cells. *Cardiovasc Res* 2012;95:419-429.
146. Heijman J, Spatjens RL, Seyen SR, et al. Dominant-negative control of cAMP-dependent IKs upregulation in human long-QT syndrome type 1. *Circ Res* 2012;110:211-219.
147. Spatjens RL, Bebarova M, Seyen SR, et al. Long-QT mutation p.K557E-Kv7.1: dominant-negative suppression of IKs, but preserved cAMP-dependent up-regulation. *Cardiovasc Res* 2014;104:216-225.

148. Ma D, Wei H, Lu J, et al. Characterization of a novel KCNQ1 mutation for type 1 long QT syndrome and assessment of the therapeutic potential of a novel IKs activator using patient-specific induced pluripotent stem cell-derived cardiomyocytes. *Stem Cell Res Ther* 2015;6:39.

### ***SCN4B***

149. Yu FH, Westenbroek RE, Silos-Santiago I, et al. Sodium channel beta4, a new disulfide-linked auxiliary subunit with similarity to beta2. *J Neurosci* 2003;23:7577-7585.
150. Maier SK, Westenbroek RE, McCormick KA, Curtis R, Scheuer T, Catterall WA. Distinct subcellular localization of different sodium channel alpha and beta subunits in single ventricular myocytes from mouse heart. *Circulation* 2004;109:1421-1427.
151. Medeiros-Domingo A, Kaku T, Tester DJ, et al. SCN4B-encoded sodium channel beta4 subunit in congenital long-QT syndrome. *Circulation* 2007;116:134-142.
152. Tan BH, Pundi KN, Van Norstrand DW, et al. Sudden infant death syndrome-associated mutations in the sodium channel beta subunits. *Heart Rhythm* 2010;7:771-778.
153. Ng D, Johnston JJ, Teer JK, et al. Interpreting secondary cardiac disease variants in an exome cohort. *Circ Cardiovasc Genet* 2013;6:337-346.
154. Lieve KV, Williams L, Daly A, et al. Results of genetic testing in 855 consecutive unrelated patients referred for long QT syndrome in a clinical laboratory. *Genet Test Mol Biomarkers* 2013;17:553-561.

### ***SCN5A***

155. Gellens ME, George AL, Jr., Chen LQ, et al. Primary structure and functional expression of the human cardiac tetrodotoxin-insensitive voltage-dependent sodium channel. *Proc Natl Acad Sci U S A* 1992;89:554-558.
156. Wang Q, Shen J, Splawski I, et al. SCN5A mutations associated with an inherited cardiac arrhythmia, long QT syndrome. *Cell* 1995;80:805-811.
157. Bennett PB, Yazawa K, Makita N, George AL, Jr. Molecular mechanism for an inherited cardiac arrhythmia. *Nature* 1995;376:683-685.
158. Wang DW, Yazawa K, George AL, Jr., Bennett PB. Characterization of human cardiac Na<sup>+</sup> channel mutations in the congenital long QT syndrome. *Proc Natl Acad Sci U S A* 1996;93:13200-13205.
159. Yamagishi H, Furutani M, Kamisago M, et al. A de novo missense mutation (R1623Q) of the SCN5A gene in a Japanese girl with sporadic long QT syndrome. *Mutations in brief no. 140. Online. Hum Mutat* 1998;11:481.
160. Benhorin J, Goldmit M, MacCluer JW, et al. Identification of a new SCN5A mutation, D1840G, associated with the long QT syndrome. *Mutations in brief no. 153. Online. Hum Mutat* 1998;12:72.

161. Kambouris NG, Nuss HB, Johns DC, Tomaselli GF, Marban E, Balsler JR. Phenotypic characterization of a novel long-QT syndrome mutation (R1623Q) in the cardiac sodium channel. *Circulation* 1998;97:640-644.
162. Bezzina C, Veldkamp MW, van Den Berg MP, et al. A single Na(+) channel mutation causing both long-QT and Brugada syndromes. *Circ Res* 1999;85:1206-1213.
163. Wattanasirichaigoon D, Vesely MR, Duggal P, et al. Sodium channel abnormalities are infrequent in patients with long QT syndrome: identification of two novel SCN5A mutations. *Am J Med Genet* 1999;86:470-476.
164. Wei J, Wang DW, Alings M, et al. Congenital long-QT syndrome caused by a novel mutation in a conserved acidic domain of the cardiac Na+ channel. *Circulation* 1999;99:3165-3171.
165. Veldkamp MW, Viswanathan PC, Bezzina C, Baartscheer A, Wilde AA, Balsler JR. Two distinct congenital arrhythmias evoked by a multidysfunctional Na(+) channel. *Circ Res* 2000;86:E91-97.
166. Wedekind H, Smits JP, Schulze-Bahr E, et al. De novo mutation in the SCN5A gene associated with early onset of sudden infant death. *Circulation* 2001;104:1158-1164.
167. Nuyens D, Stengl M, Dugarmaa S, et al. Abrupt rate accelerations or premature beats cause life-threatening arrhythmias in mice with long-QT3 syndrome. *Nat Med* 2001;7:1021-1027.
168. Valdivia CR, Ackerman MJ, Tester DJ, et al. A novel SCN5A arrhythmia mutation, M1766L, with expression defect rescued by mexiletine. *Cardiovasc Res* 2002;55:279-289.
169. Keller DI, Acharfi S, Delacretaz E, et al. A novel mutation in SCN5A, delQKP 1507-1509, causing long QT syndrome: role of Q1507 residue in sodium channel inactivation. *J Mol Cell Cardiol* 2003;35:1513-1521.
170. Wehrens XH, Rossenbacker T, Jongbloed RJ, et al. A novel mutation L619F in the cardiac Na+ channel SCN5A associated with long-QT syndrome (LQT3): a role for the I-II linker in inactivation gating. *Hum Mutat* 2003;21:552.
171. Groenewegen WA, Bezzina CR, van Tintelen JP, et al. A novel LQT3 mutation implicates the human cardiac sodium channel domain IVS6 in inactivation kinetics. *Cardiovasc Res* 2003;57:1072-1078.
172. Chang CC, Acharfi S, Wu MH, et al. A novel SCN5A mutation manifests as a malignant form of long QT syndrome with perinatal onset of tachycardia/bradycardia. *Cardiovasc Res* 2004;64:268-278.
173. Tian XL, Yong SL, Wan X, et al. Mechanisms by which SCN5A mutation N1325S causes cardiac arrhythmias and sudden death in vivo. *Cardiovasc Res* 2004;61:256-267.
174. Remme CA, Verkerk AO, Nuyens D, et al. Overlap syndrome of cardiac sodium channel disease in mice carrying the equivalent mutation of human SCN5A-1795insD. *Circulation* 2006;114:2584-2594.
175. Ruan Y, Liu N, Bloise R, Napolitano C, Priori SG. Gating properties of SCN5A mutations and the response to mexiletine in long-QT syndrome type 3 patients. *Circulation* 2007;116:1137-1144.
176. Wang DW, Crotti L, Shimizu W, et al. Malignant perinatal variant of long-QT syndrome caused by a profoundly dysfunctional cardiac sodium channel. *Circ Arrhythm Electrophysiol* 2008;1:370-378.

177. Kapa S, Tester DJ, Salisbury BA, et al. Genetic testing for long-QT syndrome: distinguishing pathogenic mutations from benign variants. *Circulation* 2009;120:1752-1760.
178. Huang H, Priori SG, Napolitano C, O'Leary ME, Chahine M. Y1767C, a novel SCN5A mutation, induces a persistent Na<sup>+</sup> current and potentiates ranolazine inhibition of Nav1.5 channels. *Am J Physiol Heart Circ Physiol* 2011;300:H288-299.
179. Malan D, Friedrichs S, Fleischmann BK, Sasse P. Cardiomyocytes obtained from induced pluripotent stem cells with long-QT syndrome 3 recapitulate typical disease-specific features in vitro. *Circ Res* 2011;109:841-847.
180. Carrasco JI, Izquierdo I, Medina P, Arnau MA, Salvador A, Zorio E. Flecainide, a therapeutic option in a patient with long QT syndrome type 3 caused by the heterozygous V411M mutation in the SCN5A gene. *Rev Esp Cardiol (Engl Ed)* 2012;65:1058-1059.
181. Ma D, Wei H, Zhao Y, et al. Modeling type 3 long QT syndrome with cardiomyocytes derived from patient-specific induced pluripotent stem cells. *Int J Cardiol* 2013;168:5277-5286.
182. Takahashi K, Shimizu W, Miyake A, Nabeshima T, Nakayashiro M, Ganaha H. High prevalence of the SCN5A E1784K mutation in school children with long QT syndrome living on the Okinawa islands. *Circ J* 2014;78:1974-1979.
183. Zhang Y, Wang J, Chang S, et al. The SCN5A mutation A1180V is associated with electrocardiographic features of LQT3. *Pediatr Cardiol* 2014;35:295-300.
184. Wilde AA, Moss AJ, Kaufman ES, et al. Clinical Aspects of Type 3 Long-QT Syndrome: An International Multicenter Study. *Circulation* 2016;134:872-882.
185. Asadi M, Foo R, Bhuiyan ZA, et al. Genetic analysis of cardiac SCN5A Gene in Iranian patients with hereditary cardiac arrhythmias. *Anatol J Cardiol* 2016;16:170-174.
186. Ter Bekke RMA, Isaacs A, Barysenka A, et al. Heritability in a SCN5A-mutation founder population with increased female susceptibility to non-nocturnal ventricular tachyarrhythmia and sudden cardiac death. *Heart Rhythm* 2017;14:1873-1881.

### ***SNTA1***

187. Wu G, Ai T, Kim JJ, et al. alpha-1-syntrophin mutation and the long-QT syndrome: a disease of sodium channel disruption. *Circ Arrhythm Electrophysiol* 2008;1:193-201.
188. Ueda K, Valdivia C, Medeiros-Domingo A, et al. Syntrophin mutation associated with long QT syndrome through activation of the nNOS-SCN5A macromolecular complex. *Proc Natl Acad Sci U S A* 2008;105:9355-9360.
189. Hu RM, Tan BH, Orland KM, et al. Digenic inheritance novel mutations in SCN5a and SNTA1 increase late I(Na) contributing to LQT syndrome. *Am J Physiol Heart Circ Physiol* 2013;304:H994-H1001.
190. Choi JI, Wang C, Thomas MJ, Pitt GS. alpha1-Syntrophin Variant Identified in Drug-Induced Long QT Syndrome Increases Late Sodium Current. *PLoS One* 2016;11:e0152355.

***TRDN***

191. Altmann HM, Tester DJ, Will ML, et al. Homozygous/Compound Heterozygous Triadin Mutations Associated With Autosomal-Recessive Long-QT Syndrome and Pediatric Sudden Cardiac Arrest: Elucidation of the Triadin Knockout Syndrome. *Circulation* 2015;131:2051-2060.
192. Walsh MA, Stuart AG, Schlecht HB, James AF, Hancox JC, Newbury-Ecob RA. Compound Heterozygous Triadin Mutation Causing Cardiac Arrest in Two Siblings. *Pacing Clin Electrophysiol* 2016;39:497-501.
